# Supplementary material
Source: publisher figshare collection journal article supplement (https://gsajournals.figshare.com/ndownloader/files/27465647)
Supplement: Supplementary file 1 [file 27465647]

### **Supplemental Material for Pers and Hansen 2021:**

**The boom and bust of the aphid’s essential amino acid metabolism across nymphal development**

Daniel Pers and Allison K. Hansen*

* Allison K. Hansen, 900 University Ave., Riverside, CA 92521. (951) 827-9271.

Email: allison.hansen@ucr.edu

**This PDF file includes:**

Supplemental Materials and Methods and Supplemental Results

Supplemental Figures S1 to S8

Supplemental Tables S1 to S8

Legends for Supplemental Datasets S1 to S10

Supplemental References

**Other supplemental materials for this manuscript include the following:**

Supplemental Datasets S1 to S10

**SUPPLEMENTAL MATERIALS AND METHODS**

**Bacteriocyte Tissue Dissections**

Bacteriocytes were collected and dissected, as in Kim et al*.* (2018), from five different developmental lifestages (1st, 2nd, 3rd, 4th instar, and young adults) residing from three biological, sub-line, replicates (Fava1, Fava2, Fava3) (N = 15 samples). Bacteriocytes were stored at -20oC in RNAlater Solution (Thermo Scientific, Waltham, MA, USA) until DNA/RNA extraction. In order to obtain more than 500 ng of pure high quality gDNA and 1 ug of pure high-quality total RNA from the same biological replicate of pooled bacteriocyte cells, approximately 900 1st instar, 700 2nd instar, 600 3rd instar, 300 4th instar, and 150 YA aphids were dissected for each sub-line (biological replicate).

**Co-extraction of DNA and RNA from Dissected Bacteriocytes**

Genomic DNA and total RNA was co-extracted from bacteriocytes dissected from each biological replicate sample (N=15) using the Quick-DNA/RNA Microprep Plus Kit (Zymo, Irvine, CA, USA). Samples were homogenized, prepared, and purified following Zymo’s Solid Tissue Protocol and eluted with RNase-free water. Residual RNA/DNA was removed from DNA/RNA samples with an RNAse A treatment or DNA-free Kit, respectively (Thermo Scientific, Waltham, MA, USA). Samples were cleaned with the Genomic DNA Clean and Concentrator-10 and RNA Clean & Concentrator-5 Kits, respectively (Zymo, Irvine, CA, USA). Purified DNA sample quality and concentration were measured via gel electrophoresis, QuickDrop (Molecular Devices, San Jose, CA, USA), and Qubit 2.0 Fluorometer (Invitrogen, Carlsbad, CA, USA). Purified RNA sample quality and concentration were measured on an RNA nano chip viatheBioanalyzer (Agilent, Santa Clara, CA, USA) by the Institute of Integrative Genome Biology Instrumentation Facilities Services at the University of California, Riverside.

**Phenotypic Analyses**

*Buchnera abundance/titer qPCR*

Bacteriocytes from all five developmental lifestages and three biological replicates (sub-lines) were dissected as described above. For *Buchnera* abundance/titer the same DNA extraction and RNAse pipeline was used as detailed above in “Co-extraction of DNA and RNA from Dissected Bacteriocytes.” DNA was extracted from bacteriocytes dissected from each biological replicate sample (N = 15), RNase treated, cleaned and concentrated. Purified gDNA from each sample was then prepared for quantitative polymerase chain reaction (qPCR). Primers specific to known single copy essential housekeeping genes (*Buchnera atpE –* F2:GGA-ATT-CTG-GGC-GGT-AAG-TT, R2:CGC-ATC-AAC-TAA-TCC-CAT-GAC; *A. pisum Ef1alpha* – 107F:CTG-ATT-GTG-CCG-TGC-TTA-TTG, 246R:TAT-GGT-GGT-TCA-GTA-GAG-TCC) were used. All qPCR reactions were run in triplicate for 40 cycles at an annealing temperature of 60oC, using 10 ng of gDNA and/or 20 ng of cDNA, 500 nM of each primer, and the iTaq Universal SYBR Green Supermix on a Bio-Rad CFX96 touch qPCR machine (Bio-Rad, Hercules, CA, USA). The Bio-Rad CFX Maestro v1.1 program (Bio-Rad, Hercules, CA, USA) calculated raw fluorescent values for each sample and this was imported into LinRegPCR (v.2020.0) for baseline correction, assignment to amplicon groups to account for primer efficiencies, and the calculation of NO= starting concentration per sample, expressed in arbitrary fluorescence units (Ramakers et al. 2003; Ruijter et al. 2009). Following Bookout et al. (2006) the normalized ratio value (ave Buchnera DNA genome copy quantity/ ave aphid DNA genome copy quantity) was computed for three biological replicates (sub-lines) for each lifestage. Outlier technical replicates from a sample (only one per sample max) were removed as described in Bookout et al. (2006) if the average of technical replicates of a sample was over 17% of coefficient of variation (CV), if there was no amplification, baseline error, or no plateau during amplification based on the LinRegPCR (Ruijter et al. 2009). An ANOVA was used to determine significant (p-value ≤ 0.05) differences between life stages for the normalized ratio values.

*Buchnera abundance/titer high throughput sequencing*

Using sequencing data from the whole-genome bisulfite sequencing (WGBSseq) runs here (see more detail below) the normalized ratio value (number of *Buchnera* reads mapped to the *Buchnera* genome / the number of aphid reads mapped to the aphid genome) was computed for three biological replicates (sub-lines) for each lifestage. An ANOVA was used to determine significant (p-value ≤ 0.05) differences between life stages for the normalized ratio values.

*Bacteriocyte Counts*

Bacteriocytes from all five developmental lifestages and three biological replicates (sub-lines) were dissected as described above. For bacteriocyte counts, bacteriocytes from each individual aphid (N= 60 per lifestage, with 20 from each of 3 sub-lines) were counted to determine the average number of bacteriocytes per female at each lifestage. An ANOVA was used to determine significant (p-value ≤ 0.05) differences in the number of bacteriocytes dissected per aphid between lifestages.

**Whole-Genome Bisulfite Sequencing (WGBSseq)**

Pure high-quality gDNA (>500 ng) was co-extracted with RNA from each bacteriocyte sample (N=15) and was submitted to the DNA Technology Core at the University of California, Davis for bisulfite conversion, library preparation, and DNA sequencing. Prior to submission, DNA samples were spiked with 1.5 ng of Lambda DNA (dam-, dcm-) per uL of sample (Thermo Scientific, Waltham, MA, USA) as a control. Lambda DNA (dam-, dcm-) is un-methylated at CpG sites, and therefore can be used to control for false positives and to determine background conversion rates from the sodium bisulfite conversion treatment. To determine the true genome-wide percentage of CpG methylation after correcting for background levels of spiked in Lambda phage control DNA, the percent of methylated Cs in the CpG context for each sample when mapped to the Lambda genome was subtracted from the percent of methylated Cs in the CpG context for each corresponding sample when mapped to the aphid genome (i.e. F1 1st instar: 4.5% - 2.2% = 2.3%). Libraries were prepared from bisulfite converted genomic DNA using the EZ DNA Methylation Lightning Kit (Zymo, Irvine, CA, USA) DNA samples followed by the ACCEL-NGS Methyl-Seq Kit (Swift BioSciences, Ann Arbor, MI, USA) and sequenced on a single lane of the NovaSeqS4 platform (PE150).

**RNA-Sequencing (RNAseq)**

Pure high-quality total RNA (>1 ug) was co-extracted with DNA from each bacteriocyte sample (N=15) and was submitted to the DNA Technology Core at the University of California, Davis for library preparation and sequencing. Libraries were prepared from poly-A purified RNA samples using the KAPA Stranded mRNA-Seq Kit (Roche, Wilmington, MA, USA) and sequenced on a single lane of the Illumina HiSeq4000 platform (PE150).

**Bioinformatic Analyses of WGBSseq Data.**

See **Dataset S9** for program specific codes utilized in this analysis. Genome coverage per sample was calculated using the following equation: Genome Coverage (X) = [(reads mapped to *A. pisum* genome: varies per sample) * (read length: 150 bp) * (paired end reads: 2)] / (*A. pisum* genome size: 541,137,574 bp).

**Bioinformatic Analyses of RNAseq Data**.

See **Dataset S10** for program specific codes utilized in this analysis.

**SUPPLEMENTAL RESULTS**

**Bacteriocyte pathway profiles dynamically change across aphid development**

For lifestage specific comparisons the KEGG pathways significantly enriched in the 1st and/or 2nd instars for the aphid’s EAA and vitamin metabolism pathways include 14 pathways: valine, leucine and isoleucine degradation, tryptophan metabolism, arginine and proline metabolism, cysteine and methionine metabolism, tyrosine metabolism, lysine degradation, phenylalanine metabolism, folate biosynthesis, retinol metabolism, thiamine metabolism, pantothenate and CoA biosynthesis, nicotinate and nicotinamide metabolism, porphyrin and chlorophyll metabolism, and the riboflavin metabolism (**Figure 3-4, Figure S6, Dataset S4**). In contrast, no EAA or vitamin metabolism pathways are enriched for the 3rd instar, 4th instar, or the young adult stage compared to others. Instead 14 EAA and vitamin KEGG pathways are depleted in these intermediate and/or later lifestages compared to others and include valine, leucine and isoleucine degradation, tryptophan metabolism, arginine and proline metabolism, cysteine and methionine metabolism, tyrosine metabolism, lysine degradation, phenylalanine metabolism, histidine metabolism, folate biosynthesis, vitamin B6 metabolism, retinol metabolism, porphyrin and chlorophyll metabolism, thiamine metabolism, and pantothenate and CoA biosynthesis (**Figure 3-4 Figure S6, Dataset S4**).

For sequential life stage comparisons of KEGG pathways the overall trend, similar to stage specific comparisons above, is that the younger bacteriocyte lifestage is significantly enriched for membrane transport, EAA, NEAA, vitamin, carbohydrate and energy, xenobiotics biodegradation, lipid, and nucleotide metabolism KEGG pathways compared to the older sequential lifestages (**Figure 3-4, Dataset S4**). For example, for the EAA and vitamin KEGG pathways the arginine and proline metabolism, phenylalanine metabolism, tyrosine metabolism, retinol metabolism, and the porphyrin and chlorophyll metabolism are significantly enriched in 1st compared to the 2nd instar bacteriocytes (**Dataset S4**). For the next transition, 12 EAA and vitamin pathways are significantly enriched in the 2nd compared to the 3rd instar and include valine, leucine and isoleucine degradation, tryptophan metabolism, arginine and proline metabolism, cysteine and methionine metabolism, tyrosine metabolism, phenylalanine metabolism, folate biosynthesis, vitamin B6 metabolism, retinol metabolism, porphyrin and chlorophyll metabolism, thiamine metabolism, and pantothenate and CoA biosynthesis (**Dataset S4**). For the intermediate to late nymphal instar transition, the KEGG pathways valine, leucine and isoleucine degradation, cysteine and methionine metabolism, retinol metabolism, porphyrin and chlorophyll metabolism, and the thiamine metabolism are significantly enriched in 3rd compared to the 4th instar. For the last nymphal instar to the adult transition the cysteine and methionine metabolism and the histidine metabolism are significantly enriched in the 4th instar compared to the young adult stage (**Dataset S4**).

For aphid developmental and signaling pathways in bacteriocytes the majority of these pathways are significantly enriched in the 3rd instar compared to 4th instar and compared to other lifestages (**Figure S7**). For example, the hedgehog signaling pathway - fly, TGF-beta signaling pathway, Wnt signaling pathway, Dorso-ventral axis formation, Hippo signaling pathway, FoxO signaling pathway, MAPK signaling pathway, Notch signaling pathway, Hippo signaling pathway - multiple species, and the mTOR signaling KEGG pathways are all significantly enriched in the third instar compared to other lifestages. Only three KEGG pathways were significantly depleted in the 3rd instar compared to other lifestages and include the Neuroactive ligand-receptor interaction, Toll and Imd signaling pathway, and Phototransduction (**Figure S7**). For sequential lifestage comparisons, only two developmental and signaling KEGG pathways were enriched in 2nd compared to 3rd instar and include the Toll and Imd signaling pathway and Phototransduction, whereas six pathways were significantly depleted in the 2nd compared to the 3rd instar, such as the Wnt signaling pathway, Hedgehog signaling pathway - fly, TGF-beta signaling pathway, Notch signaling pathway, MAPK signaling pathway, and FoxO signaling pathway (**Figure S7**). For the 3rd to 4th instar transition the Hippo signaling, Dorso-ventral axis formation, MAPK signaling, ECM-receptor interaction pathways are significantly enriched in the 3rd compared to the 4th instar.

The bacteriocytes of early nymphal instars (1st and 2nd) are very dynamic in both the significant enrichment and depletion of aphid developmental and signaling pathways (**Dataset S4**). For example, the Neuroactive ligand-receptor interaction, Toll and Imd signaling pathway, ECM-receptor interaction, and Phototransduction are significantly enriched in 1st instar bacteriocytes compared to other lifestages, whereas the KEGG pathways Hedgehog signaling pathway - fly, Wnt signaling pathway, TGF-beta signaling pathway, Hippo signaling pathway - multiple species, and the FoxO signaling pathway are significantly depleted in 1st instar bacteriocytes compared to other lifestages. In sequential lifestage comparisons, only three pathways are significantly enriched in 1st instars compared to the 2nd instar bacteriocytes and include the Neuroactive ligand-receptor interaction, Toll and Imd signaling pathway, and Phototransduction. Whereas seven pathways are significantly depleted in 1st instar compared to the 2nd instar and include Hedgehog signaling pathway - fly, Hippo signaling pathway - multiple species, TGF-beta signaling pathway, Wnt signaling pathway, Dorso-ventral axis formation, Hippo signaling pathway, and the mTOR signaling pathway (**Dataset S4**).

**SUPPLEMENTAL FIGURES AND TABLES**


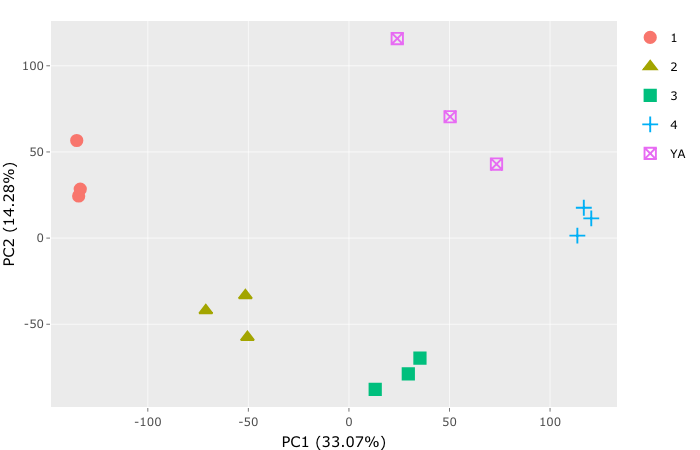


**Figure S1.** Principal Component Analysis of RNAseq profiles for each lifestage bacteriocyte sample. Bacteriocytes dissected from each developmental lifestage are represented by unique shapes and colors (red circle = 1st instar nymphs; yellow triangle = 2nd instar nymphs; green square = 3rd instar nymphs; blue cross = 4th instar nymphs; magenta box with an “X” = young adults (YA)). Each lifestage includes three biological replicates of aphid sub-lines reared on *Vicia faba*. PC1 explains 33.07% of total variance. PC2 explains 14.28% of total variance.


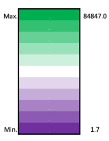


**Figure S2. Gene expression of symbiotic metabolism genes.** Average mRNA expression (normalized read count from three biological replicates) of genes (LOC# & gene name) known to have various functions within symbiotic metabolism (left of LOC#’s) across five developmental life stages (1st instar nymph through young adult). Green represents maximum global expression. White represents median global expression. Purple represents minimum global expression. Lighter shades represent levels approaching the median from the max/min in a proportional manner. Darker shades represent levels approaching the max/min from the median in a proportional manner. Black represents the absence of expression data in RNAseq transcriptome (not expressed in bacteriocytes).


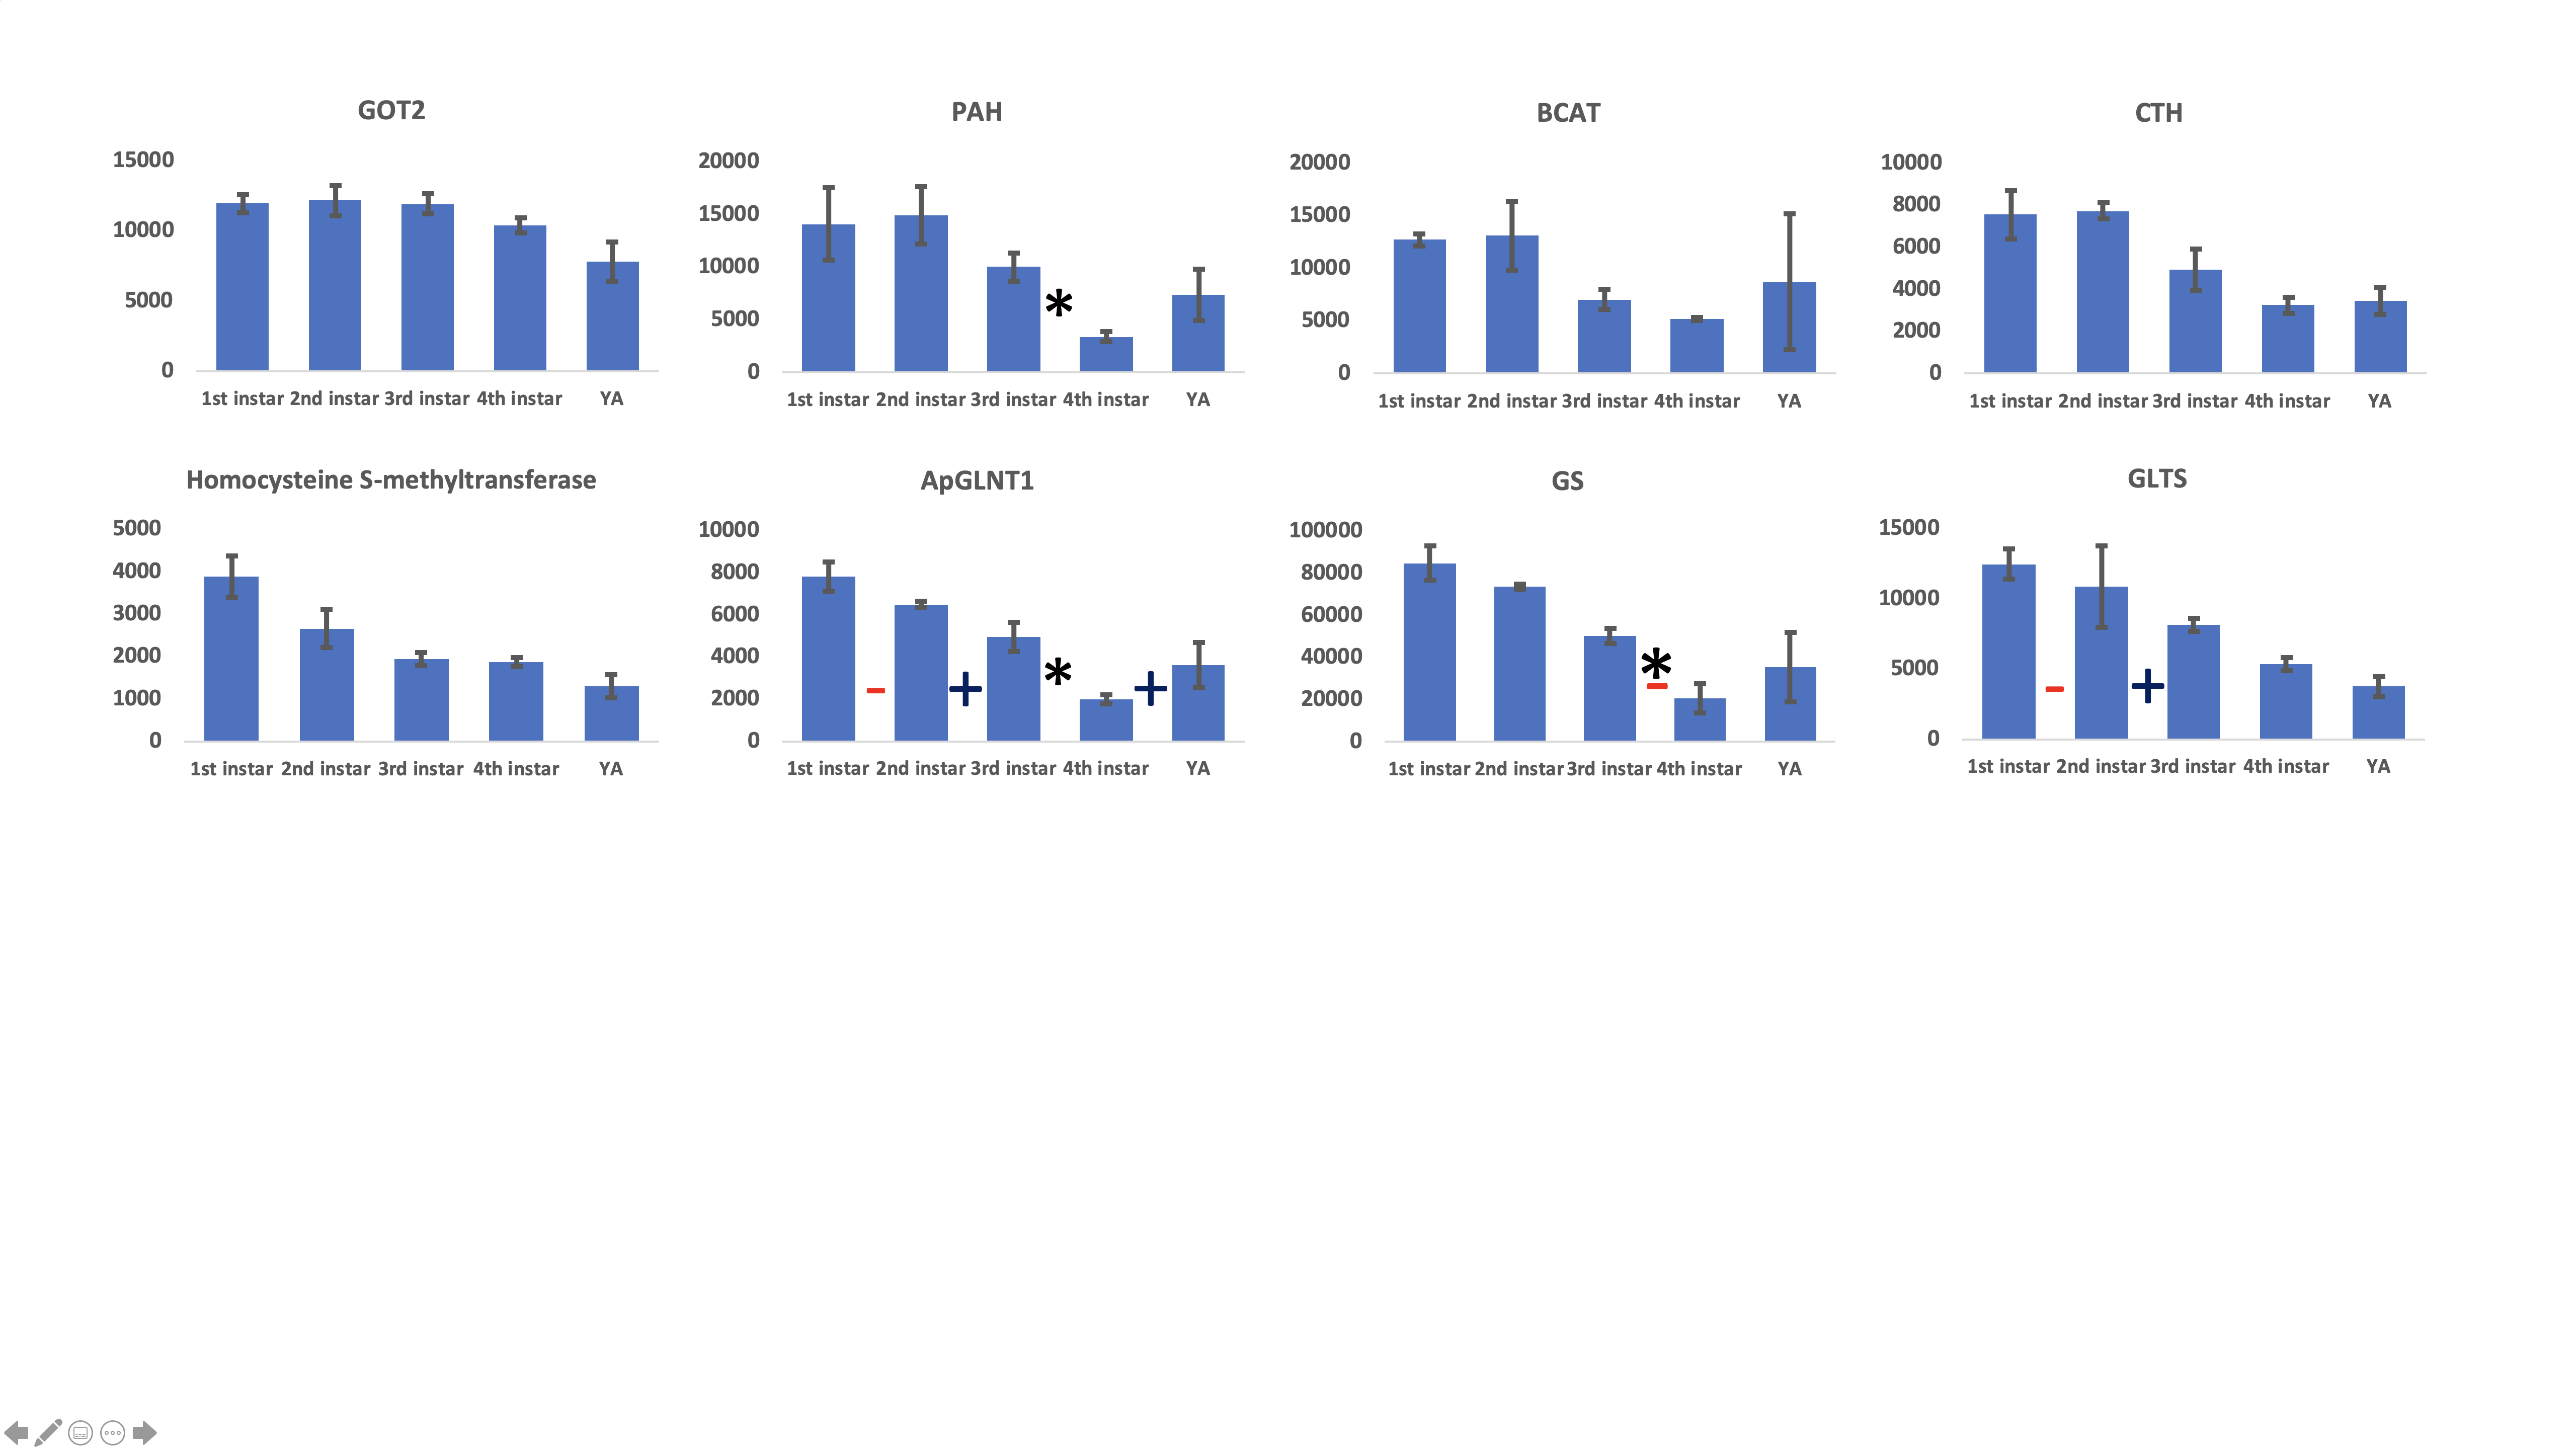


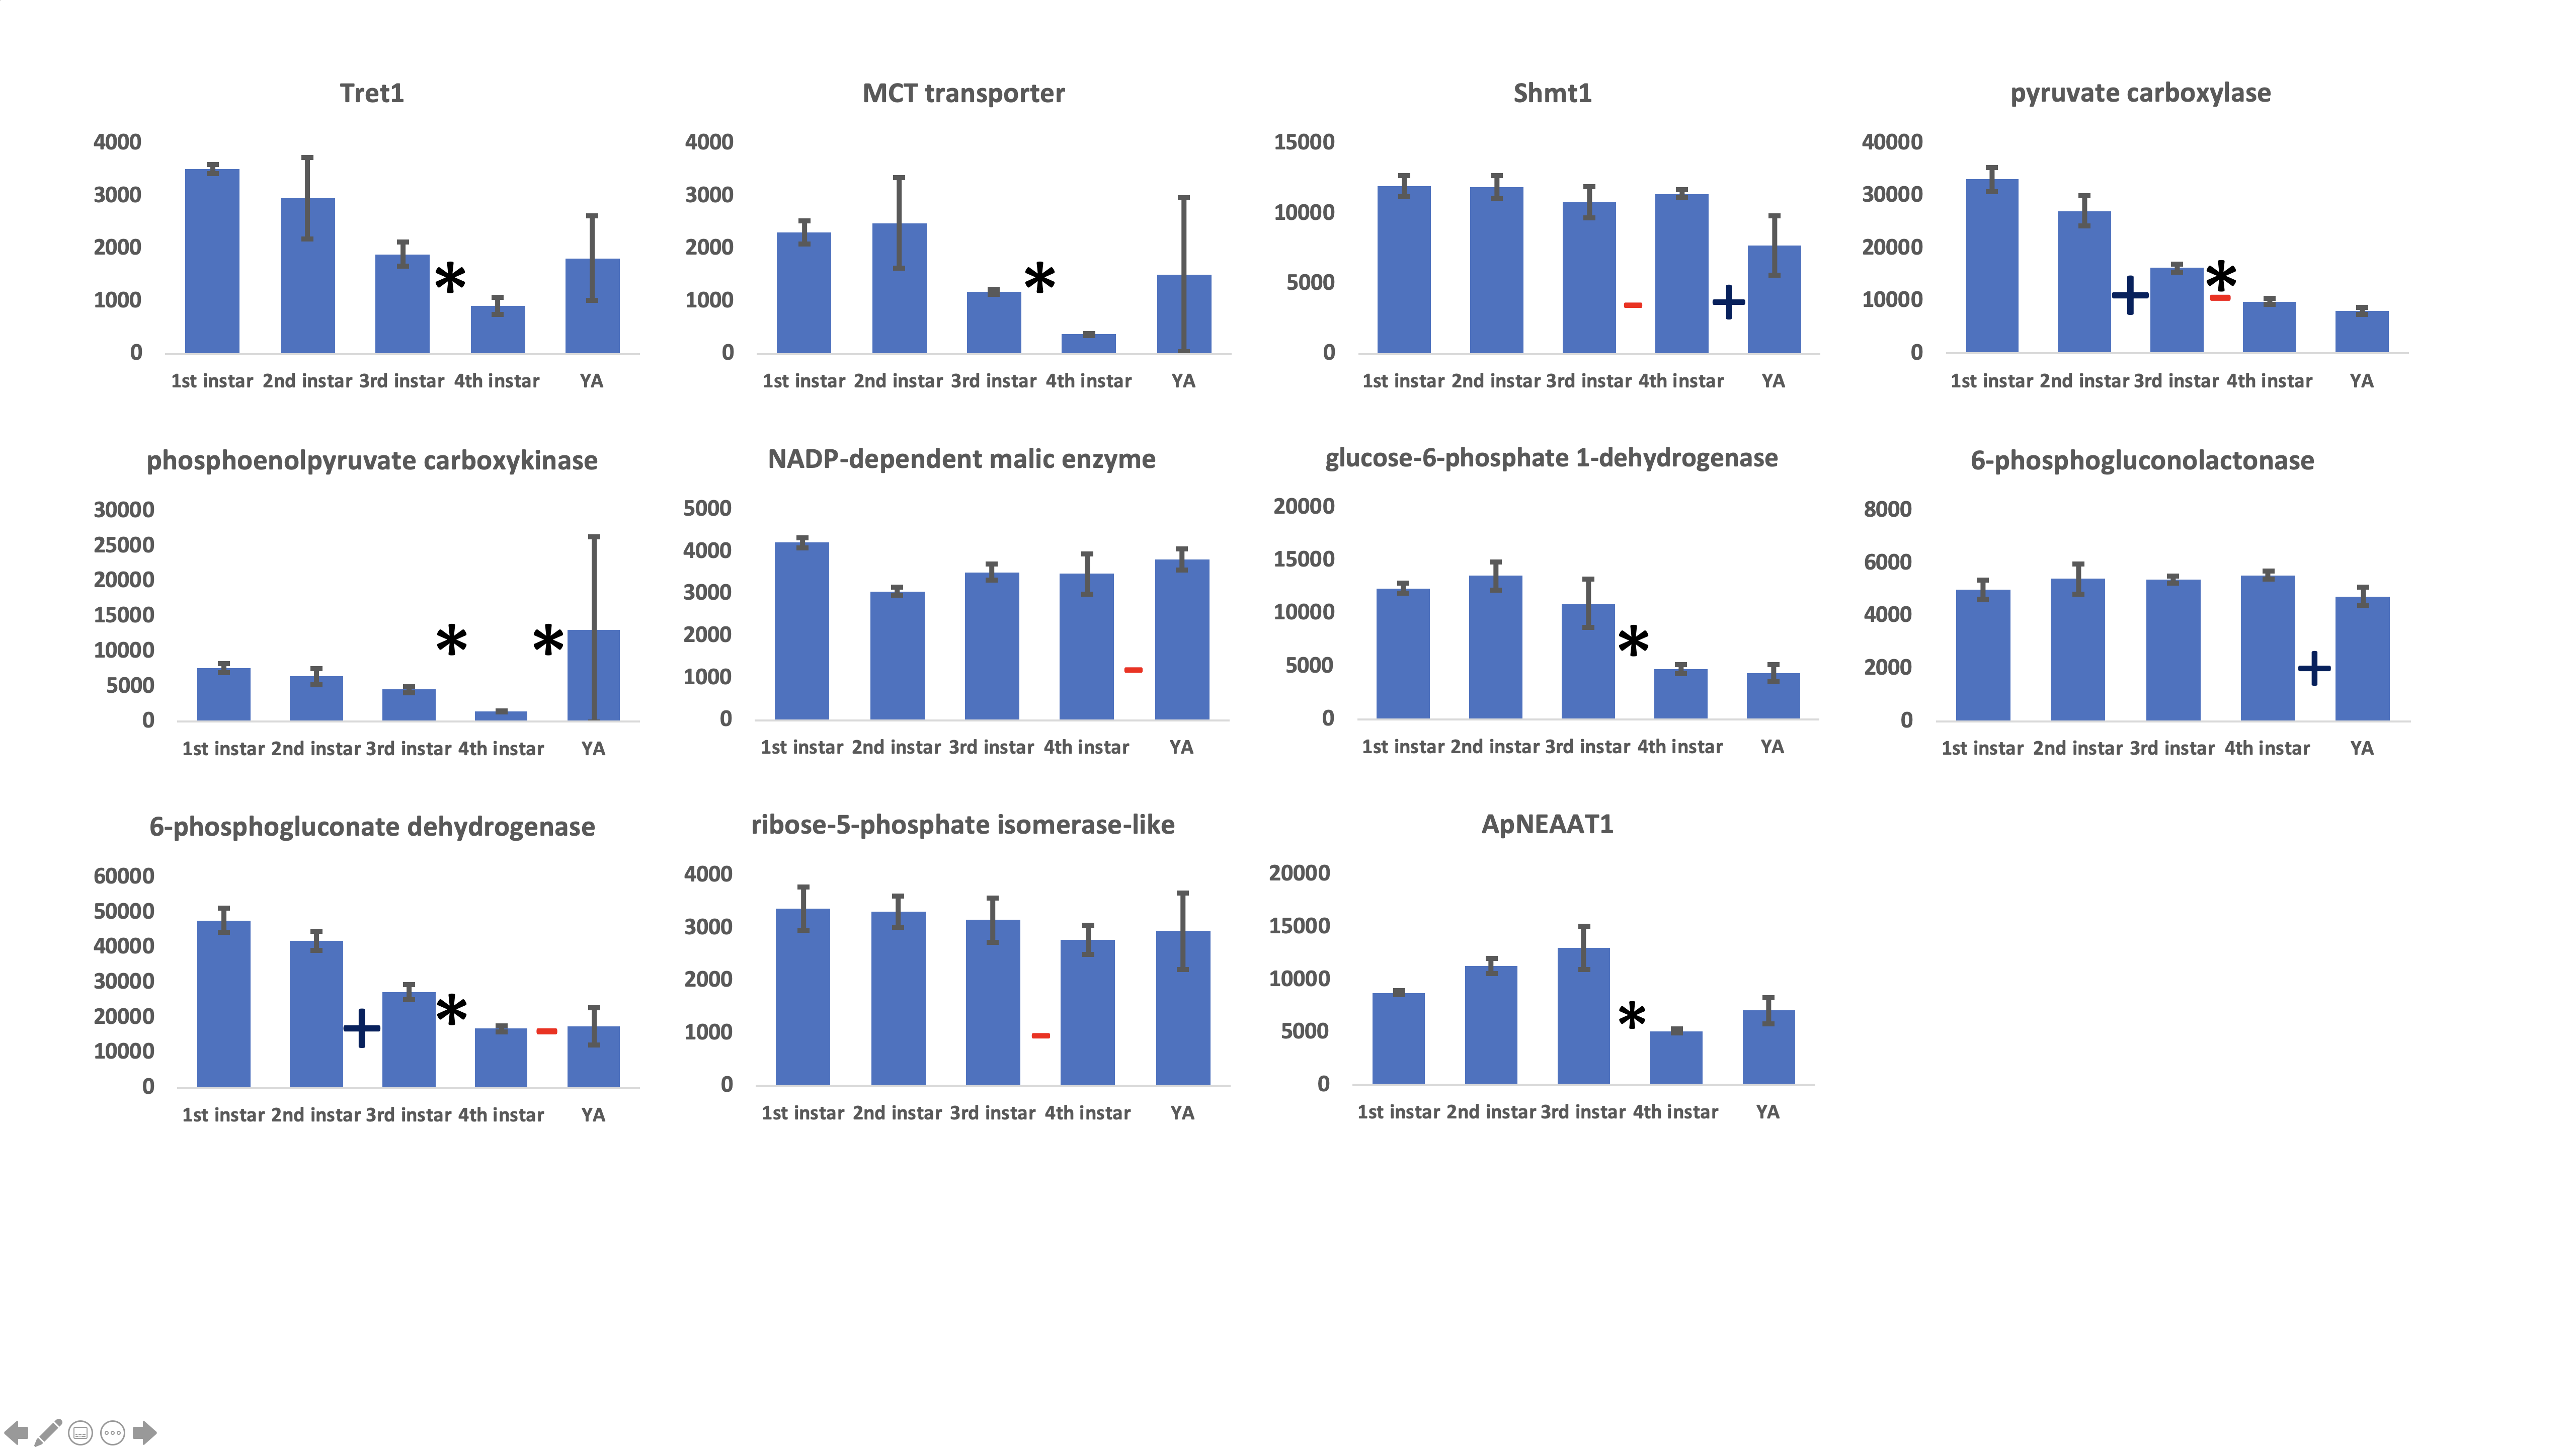


**Figure S3.** Gene expression and DNA methylation state of a subset of symbiotic metabolism genes of interest. Average mRNA expression (normalized read count from three biological replicates per lifestage) of genes known to have various functions within symbiotic metabolism across five developmental lifestages (1st instar nymph through young adult). Error bars represents standard deviation. Black asterisk represents significant differential expression (p ≤ 0.01 & fold change ≥ 2.0) between sequential lifestages. Blue plus represents significant hypermethylation between sequential lifestages and red hyphen represents significant hypomethylation between sequential lifestages (p ≤ 0.05 & % change in methylation ≥ 25%; hyper- or hypo- is in reference to the latter stage compared to the former). Specific genes were chosen based on having significant differential expression and/or methylation in this study as well as between bacteriocyte and body tissue in Kim et al. (2018).

**
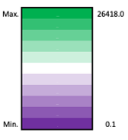
**

**Figure S4. Gene expression of developmental genes of interest.** Average mRNA expression (normalized read count from three biological replicates) of genes known to have various functions within numerous developmental pathways and processes across five developmental life stages (1st instar nymph through young adult). Green represents maximum global expression. White represents median global expression. Purple represents minimum global expression. Lighter shades represent levels approaching the median from the max/min in a proportional manner. Darker shades represent levels approaching the max/min from the median in a proportional manner.


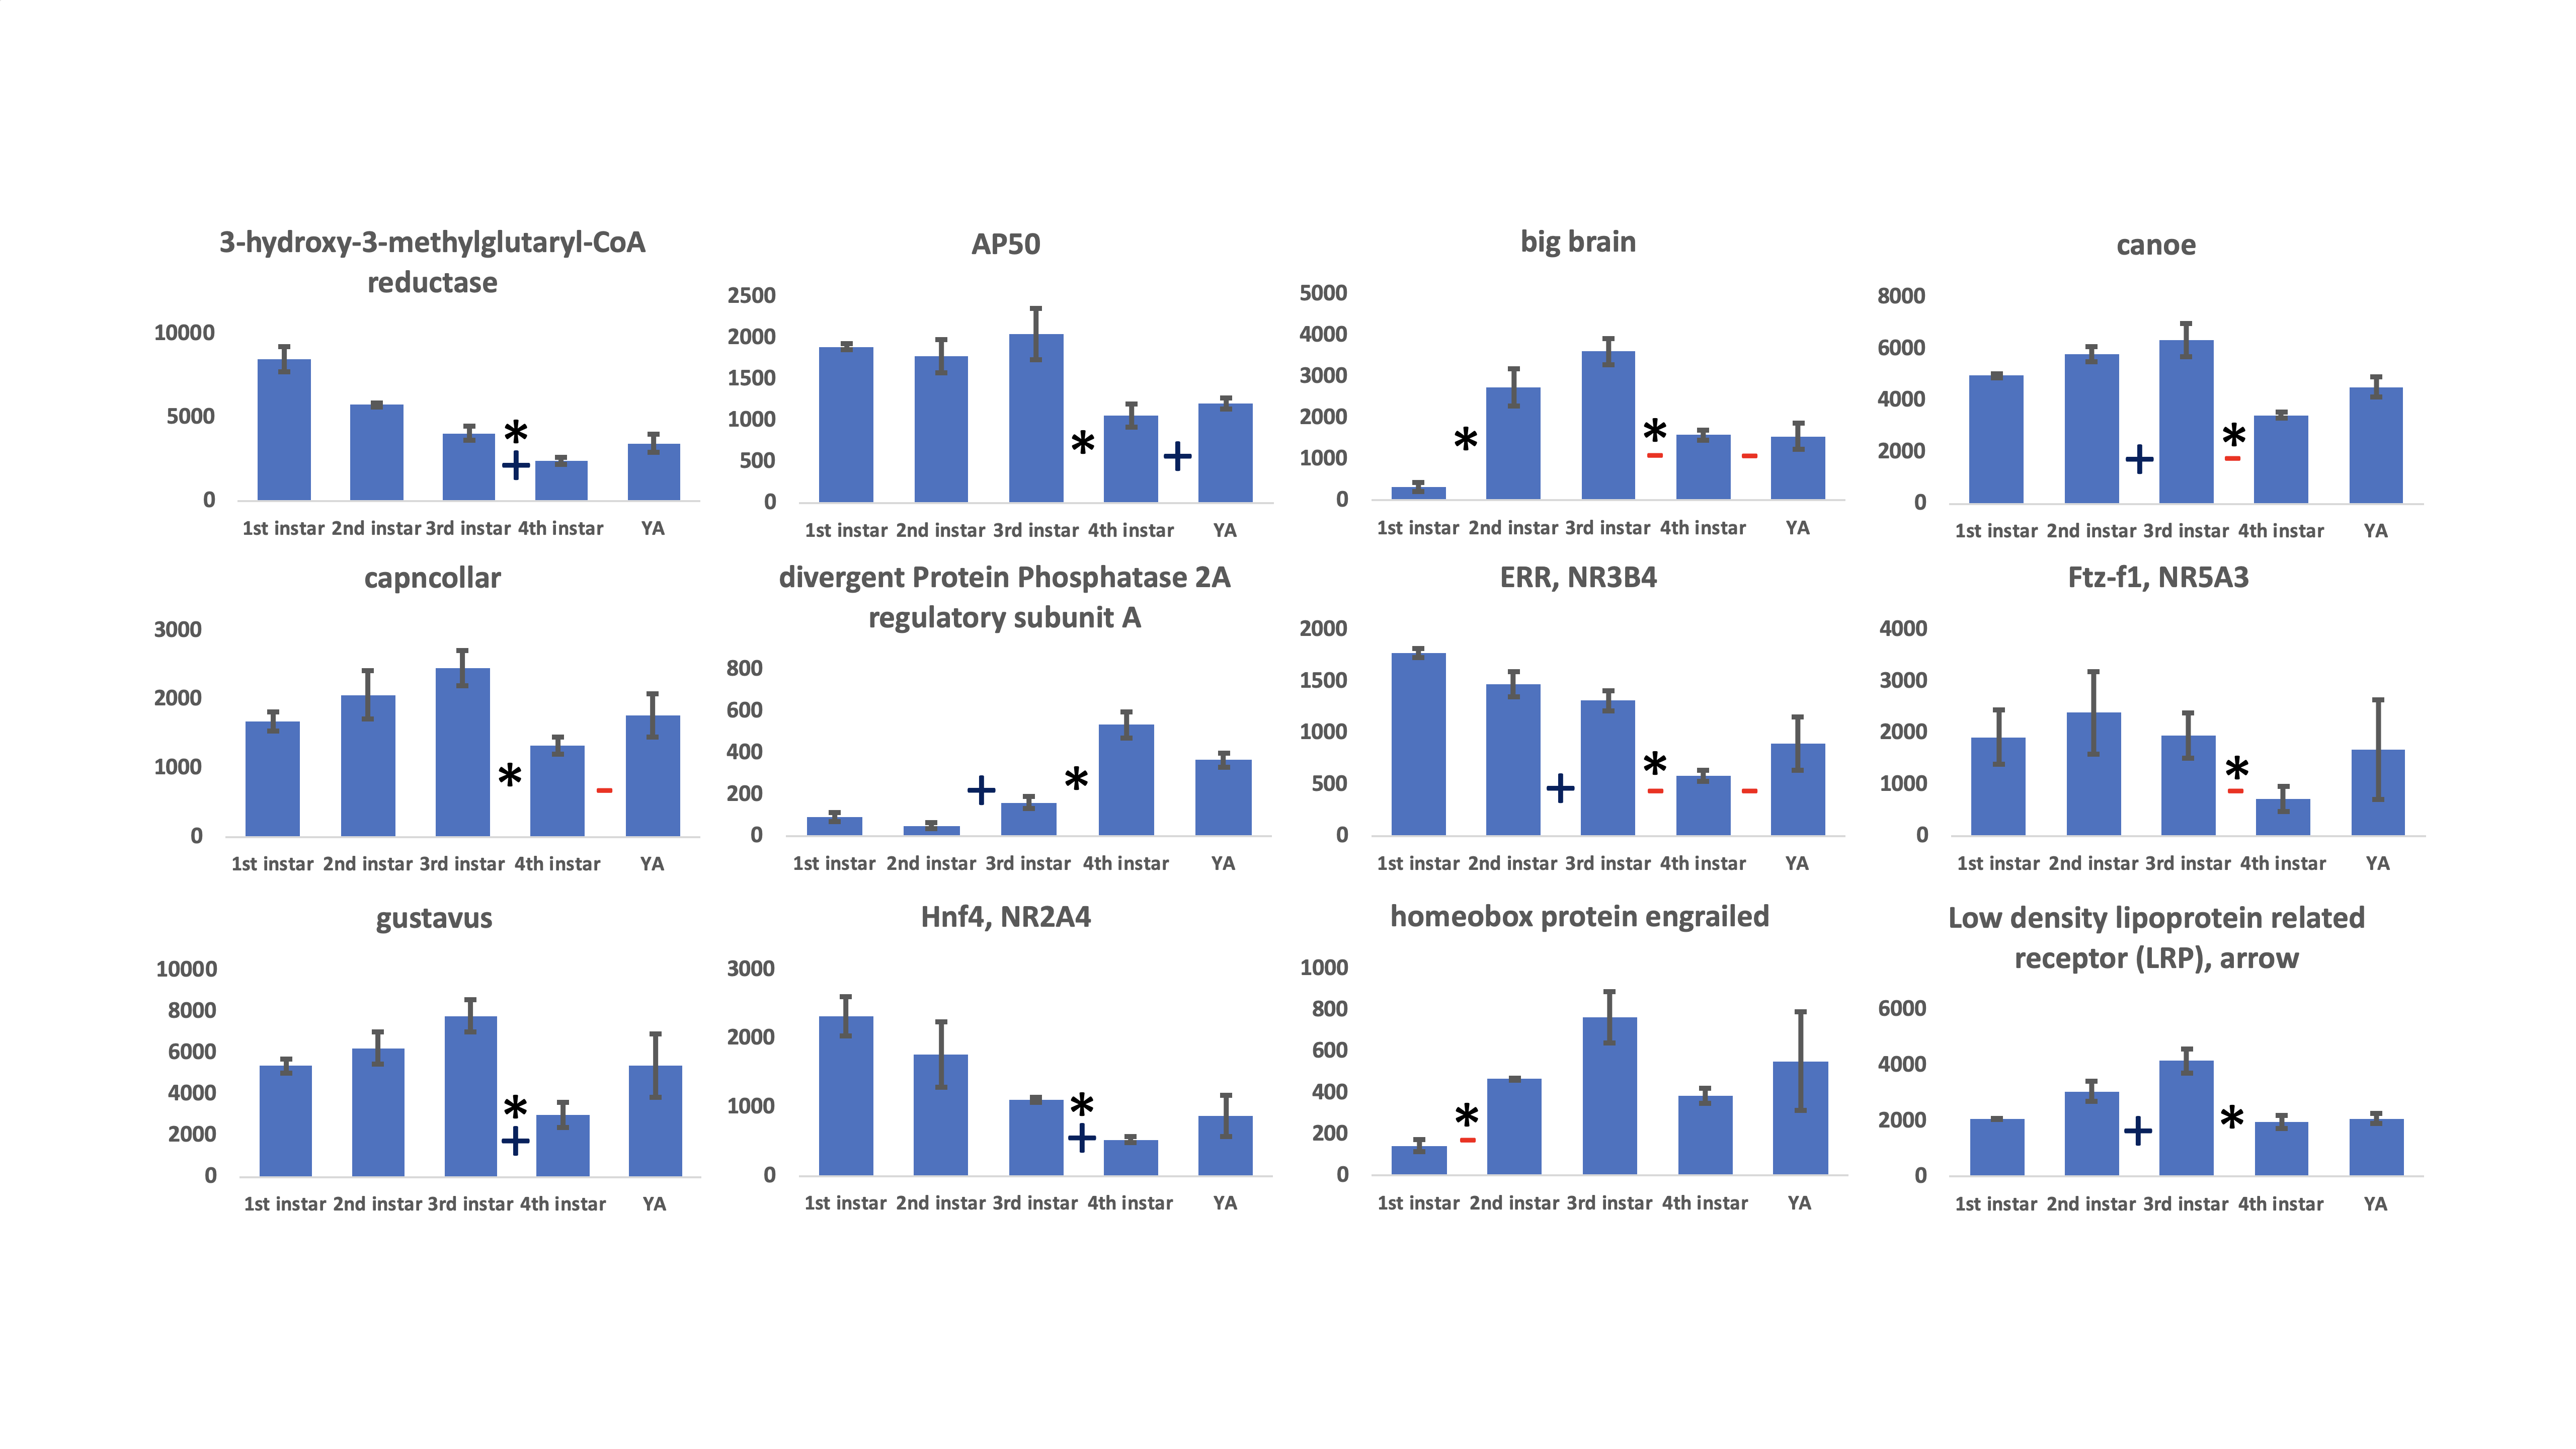

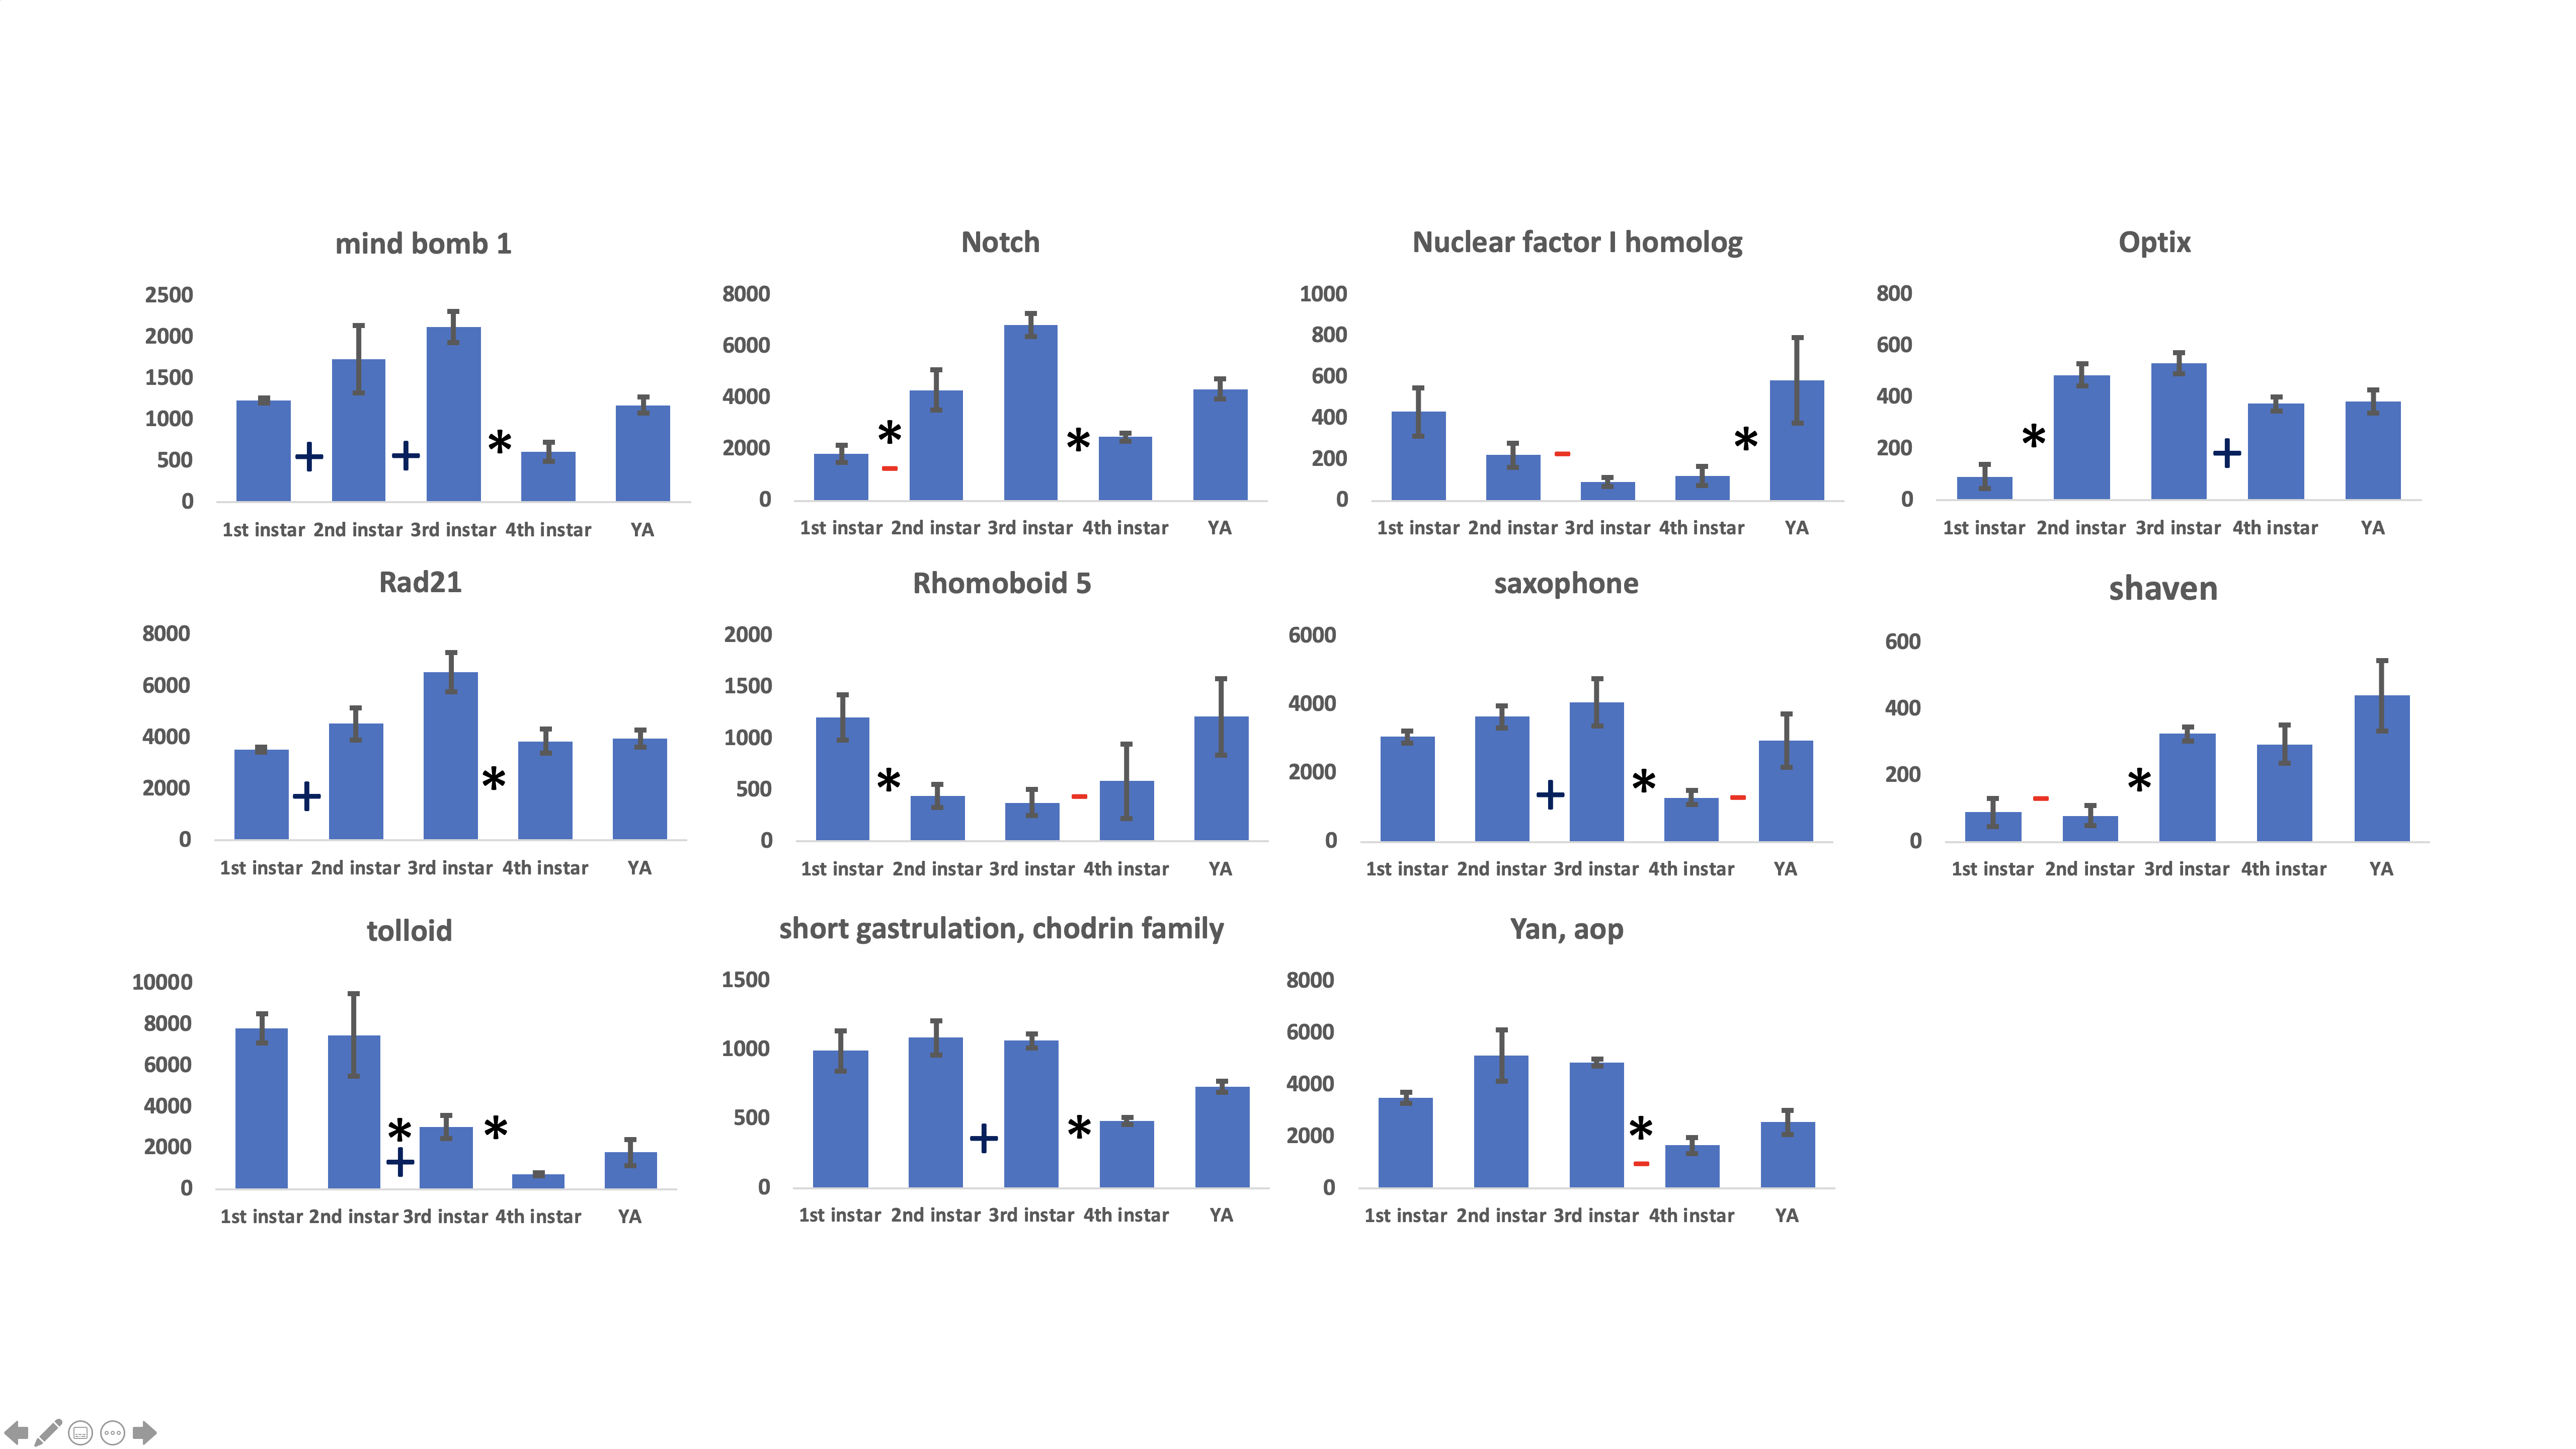


**Figure S5.** Gene expression and DNA methylation state of a subset of developmental genes of interest. Average mRNA expression (normalized read count from three biological replicates per lifestage) of genes known to have various functions within developmental processes and pathways across five developmental lifestages (1st instar nymph through young adult). Error bars represents standard deviation. Black asterisk represents significant differential expression (p ≤ 0.01 & fold change ≥ 2.0) between sequential lifestages. Blue plus represents significant hypermethylation between sequential lifestages and red hyphen represents significant hypomethylation between sequential lifestages (p ≤ 0.05 & % change in methylation ≥ 25%; hyper- or hypo- is in reference to the latter stage compared to the former). Specific genes were chosen based on having both significant differential expression and methylation in this study.


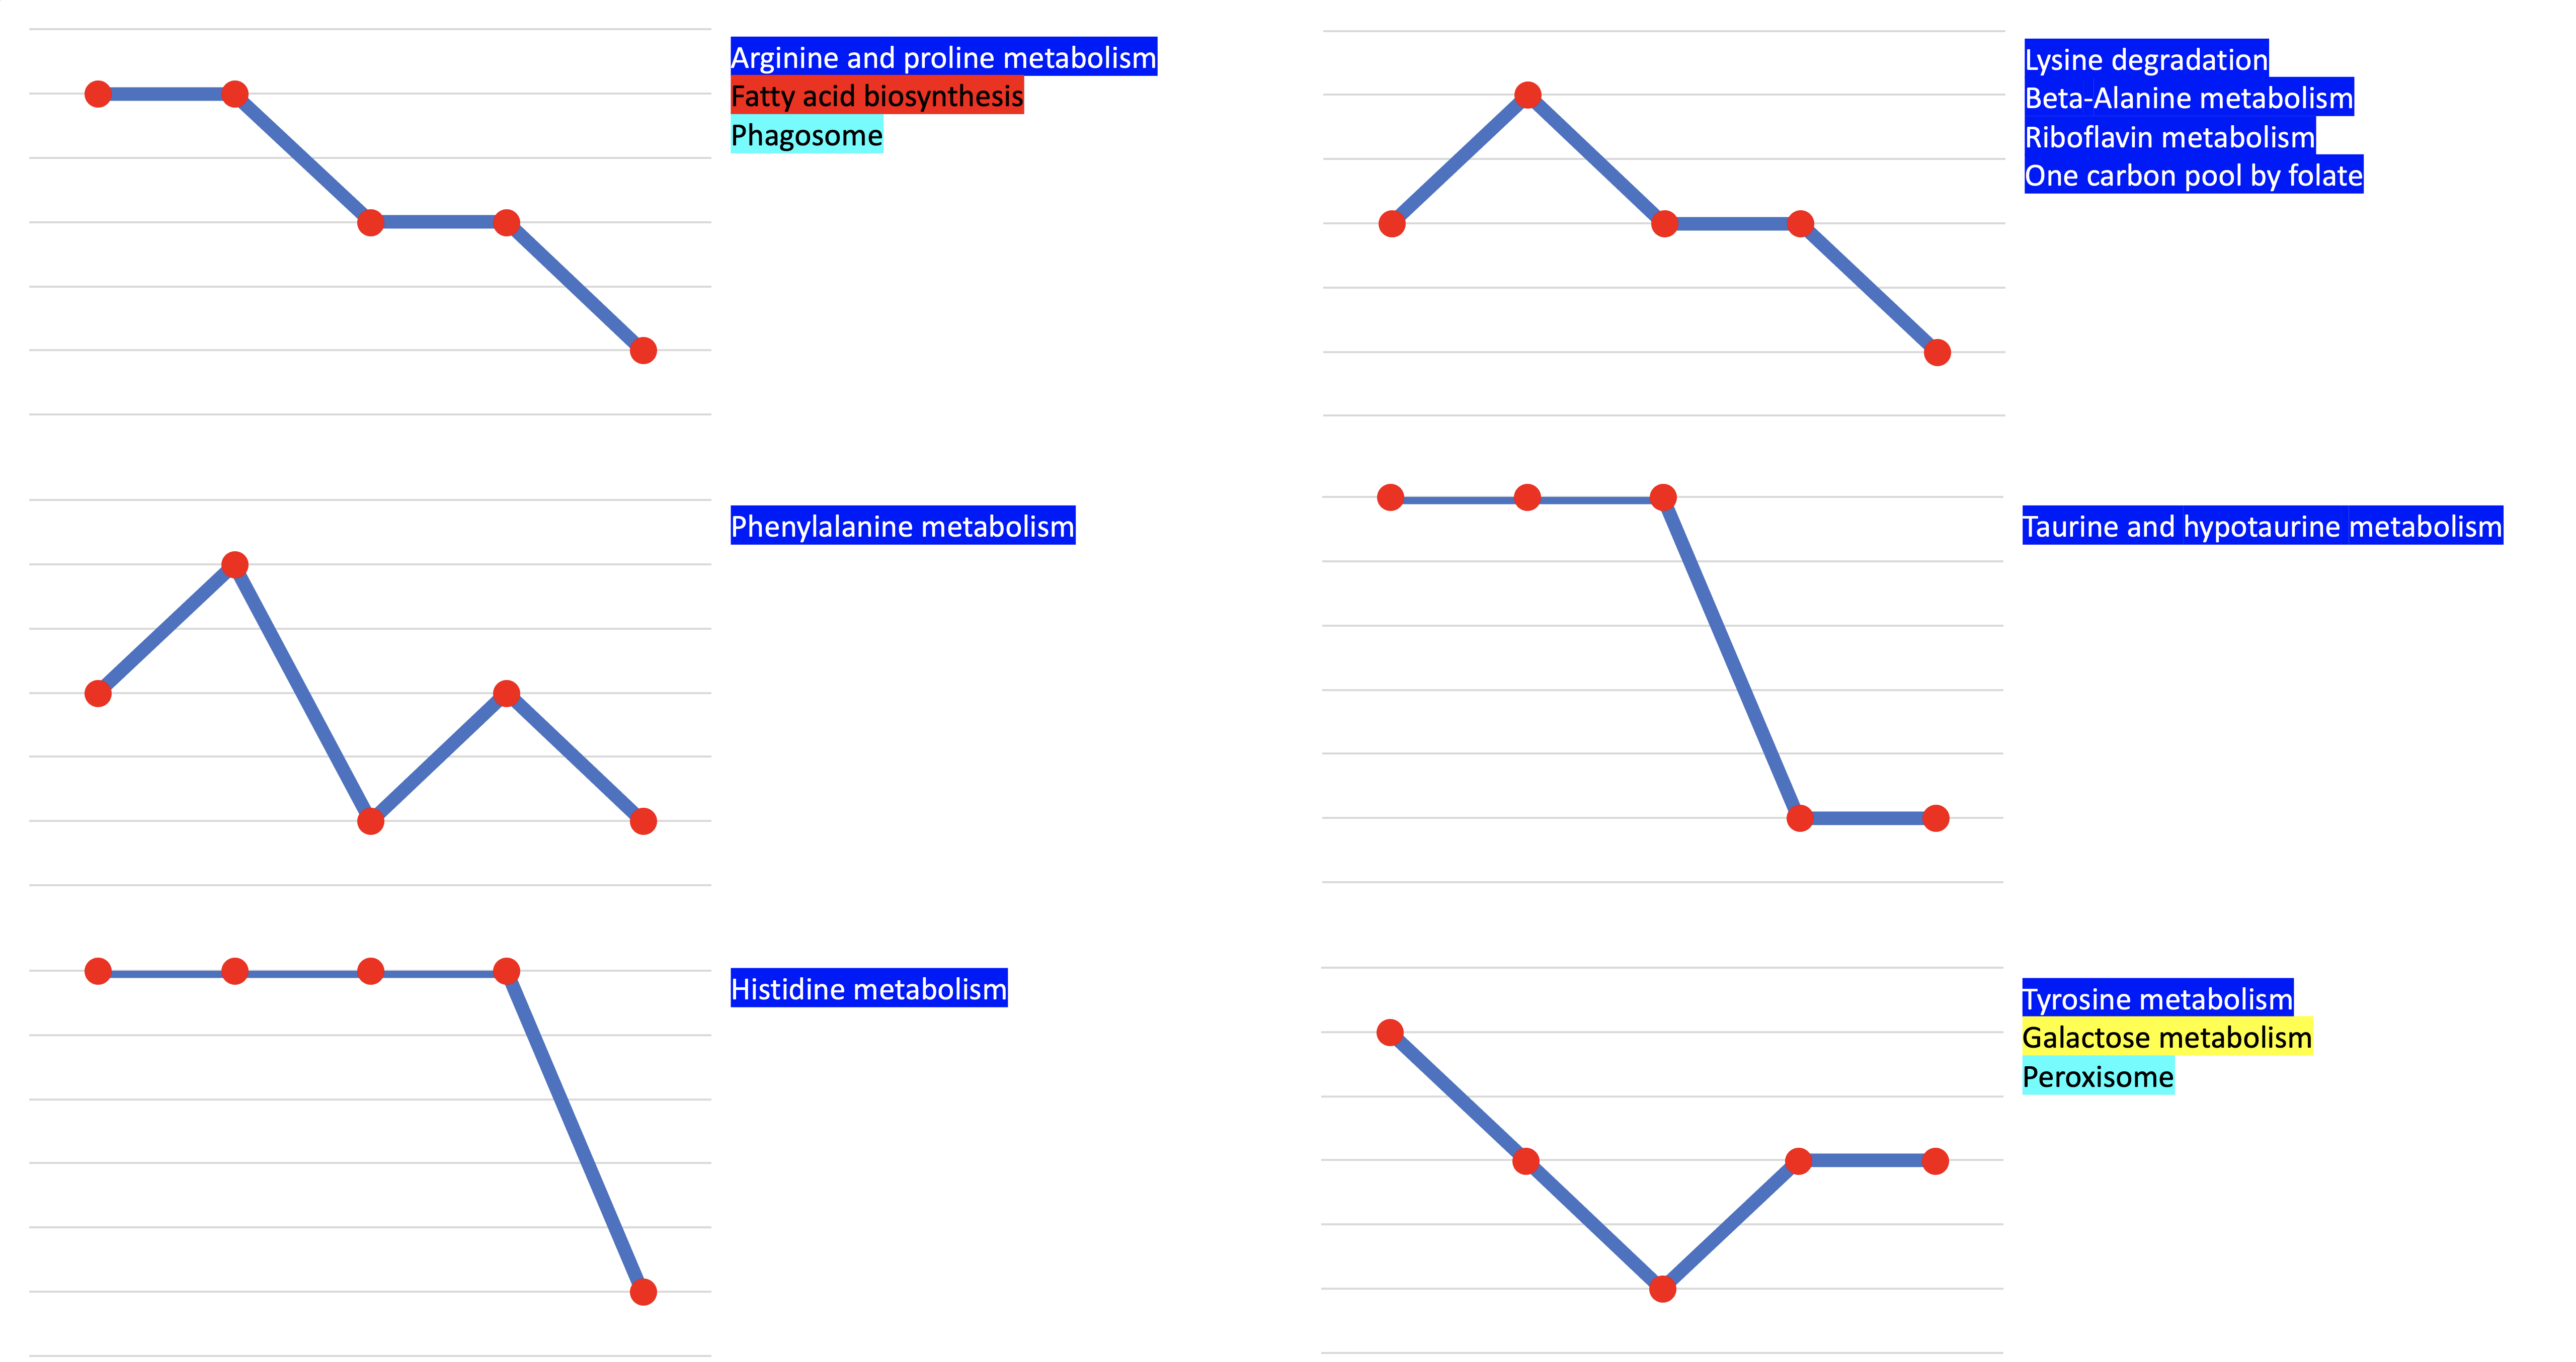


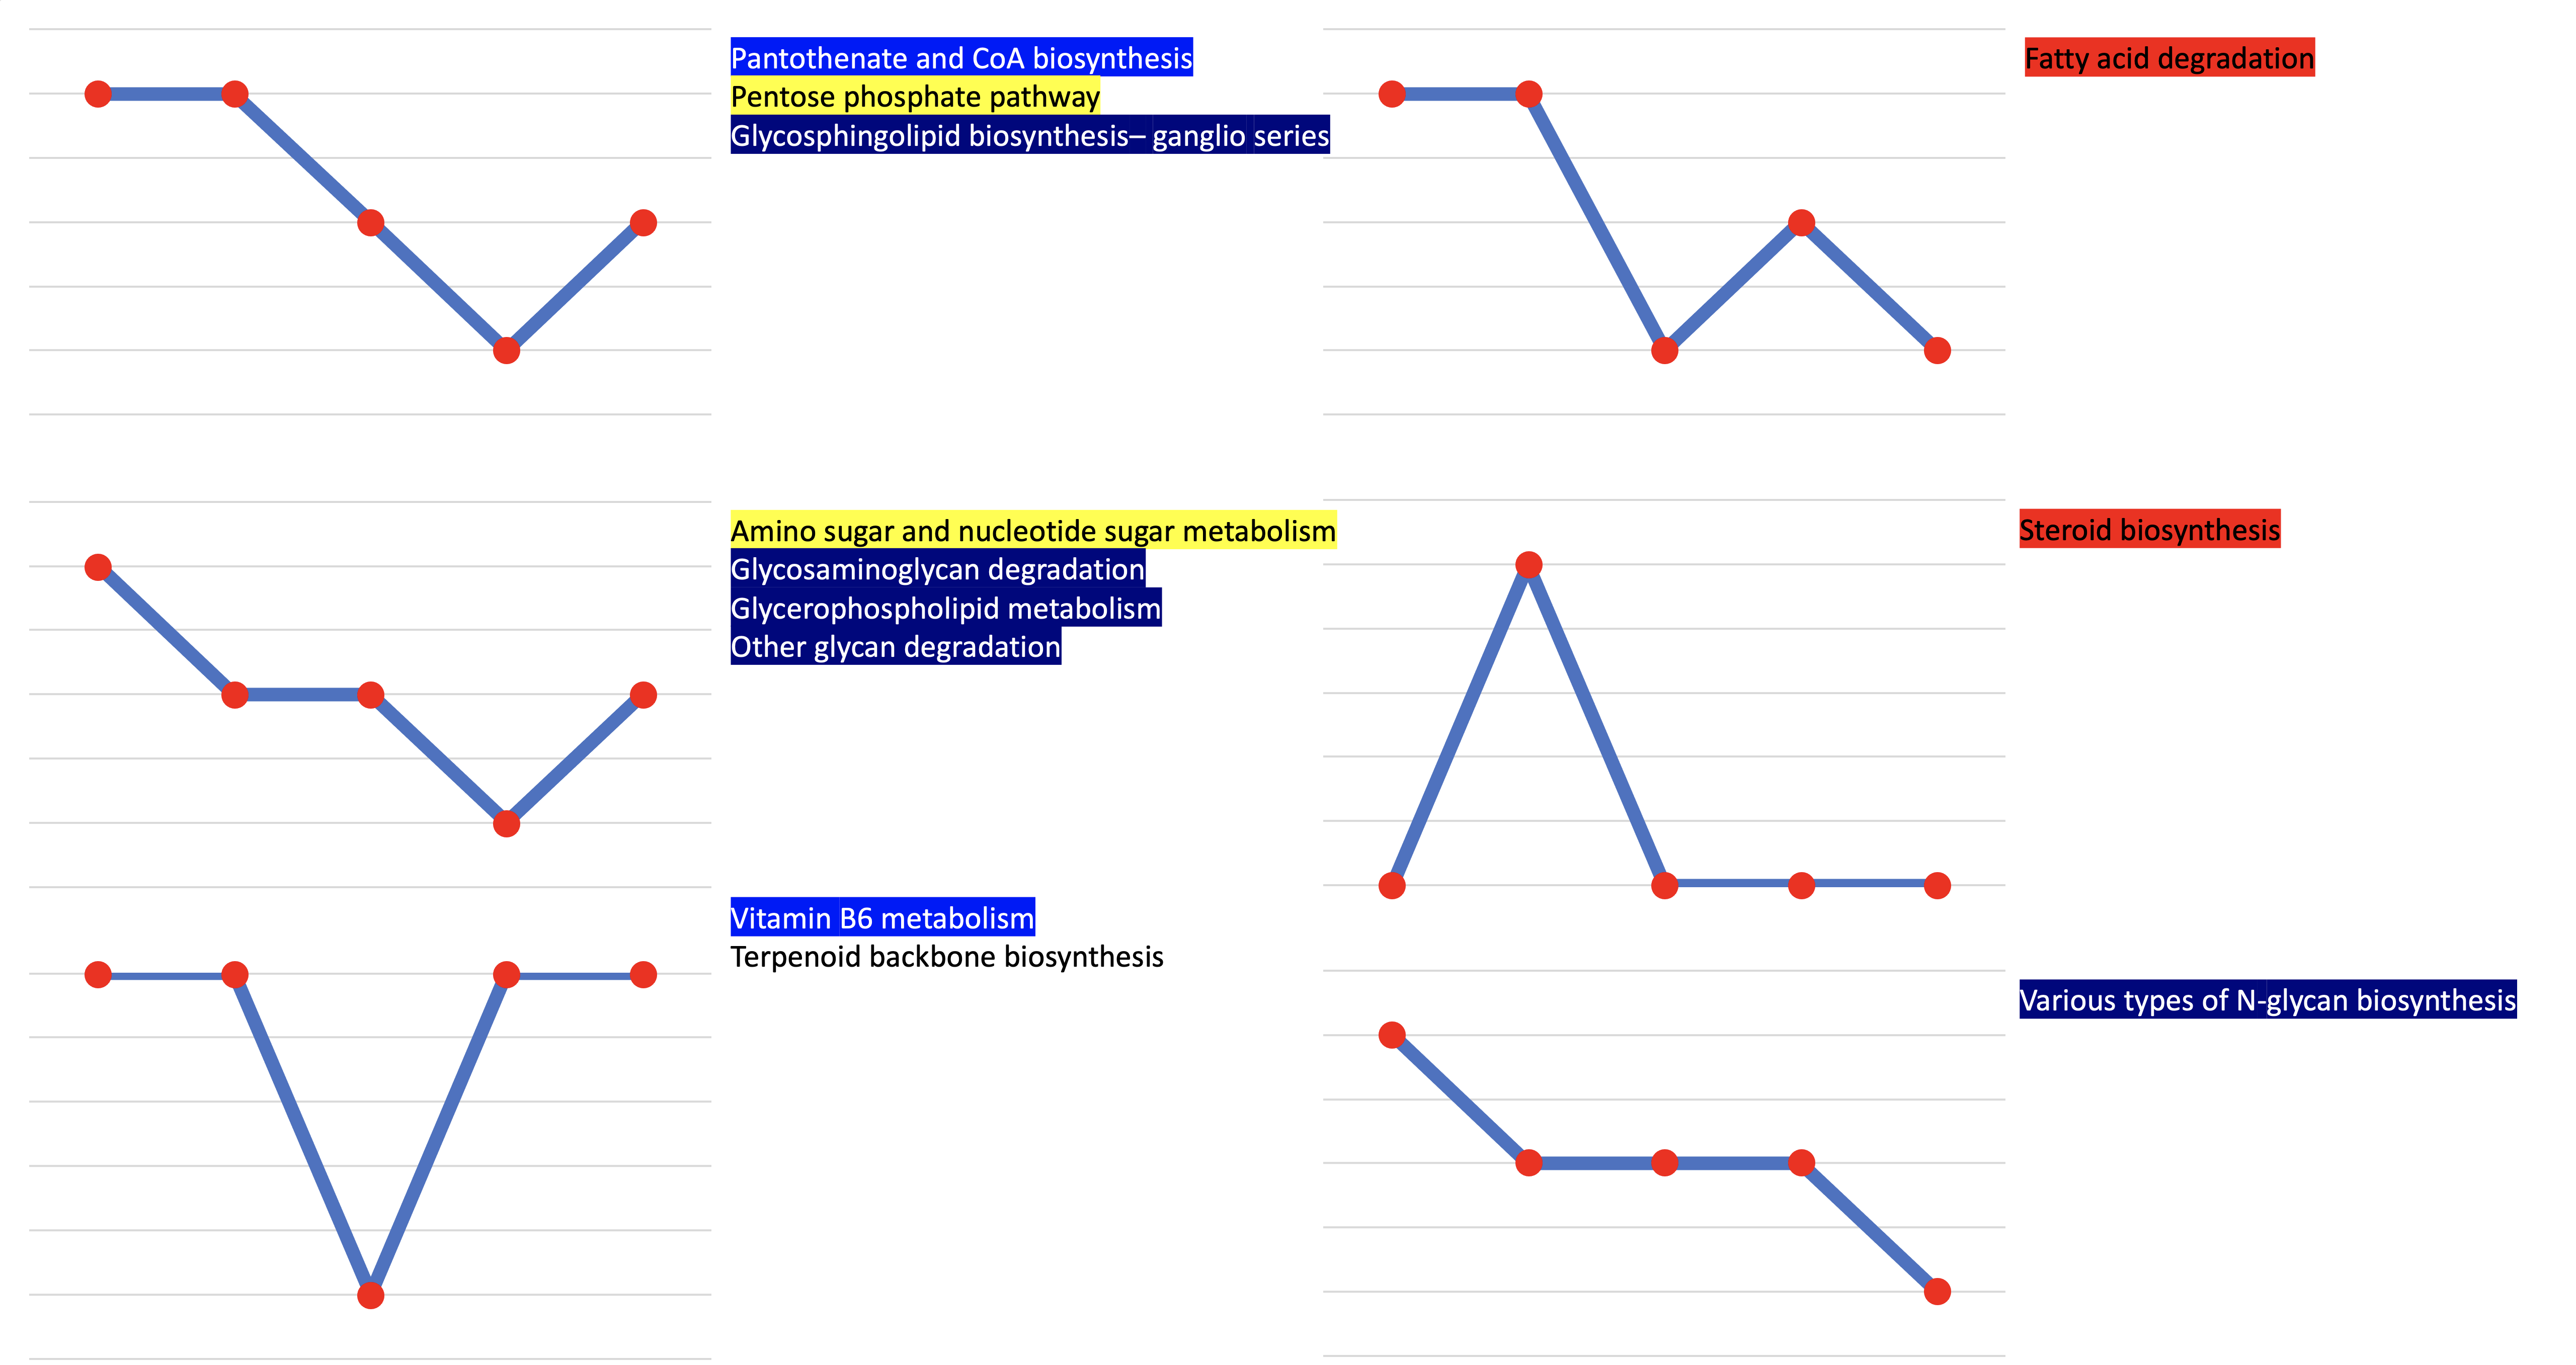


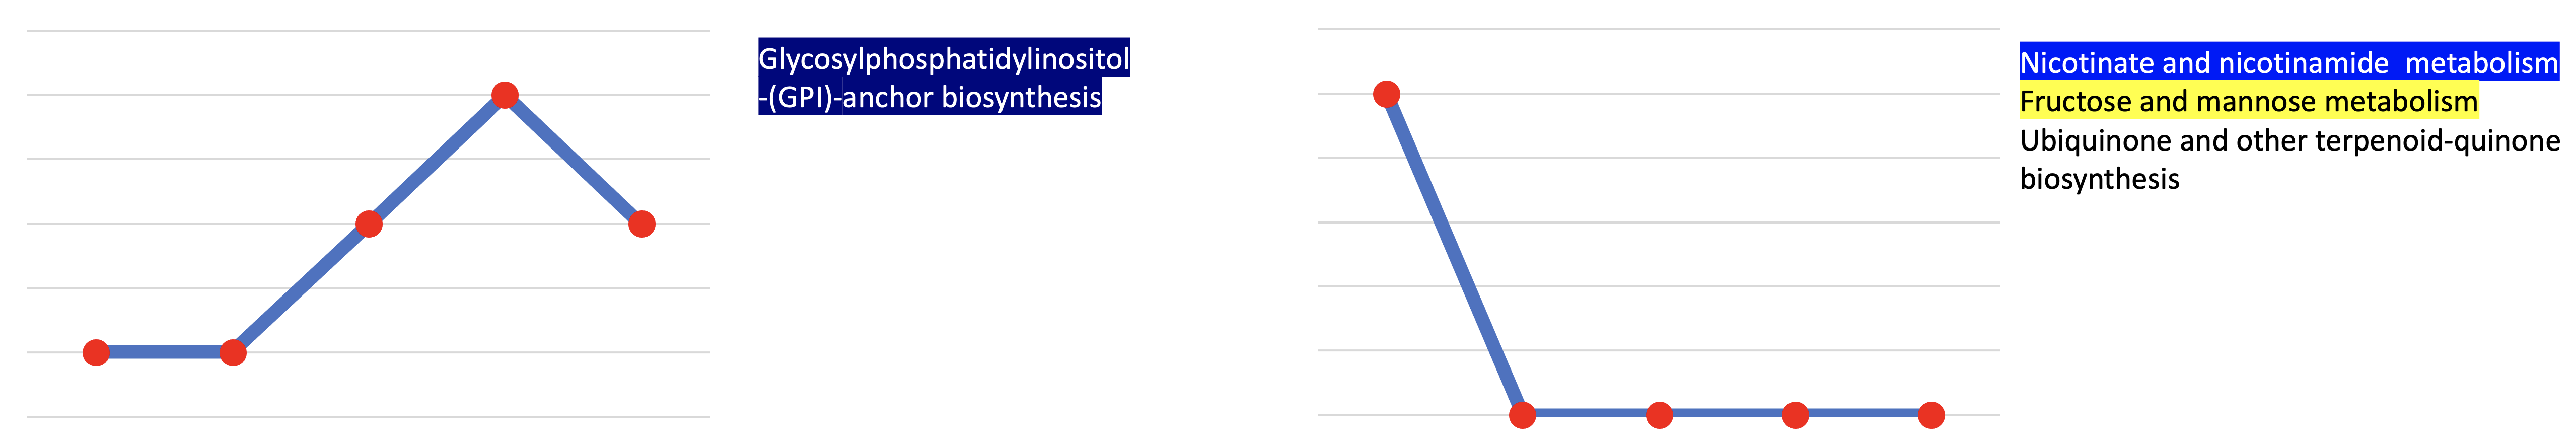


**
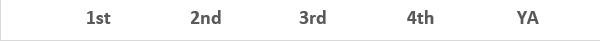

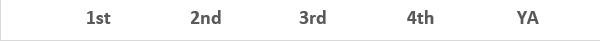
**

**Figure S6.** Enrichment dynamics of additional metabolic KEGG pathways.Each panel is a graphical representation of each KEGG pathway portraying if it is enriched, non-significantly changed, or depleted (y-axis, based on data in **Dataset S4**) following GSEA analysis comparing each lifestage (chronologically along x-axis) to all other stages. KEGG pathways associated with each pattern are listed to the right of each graph. Color corresponds to the classification of each pathway (Blue w/ white: amino acid and vitamin; yellow w/ black: carbohydrate and energy; red w/ black: lipid; navy w/ white: glycan; sky blue w/ black: information processing; white w/ black: other).


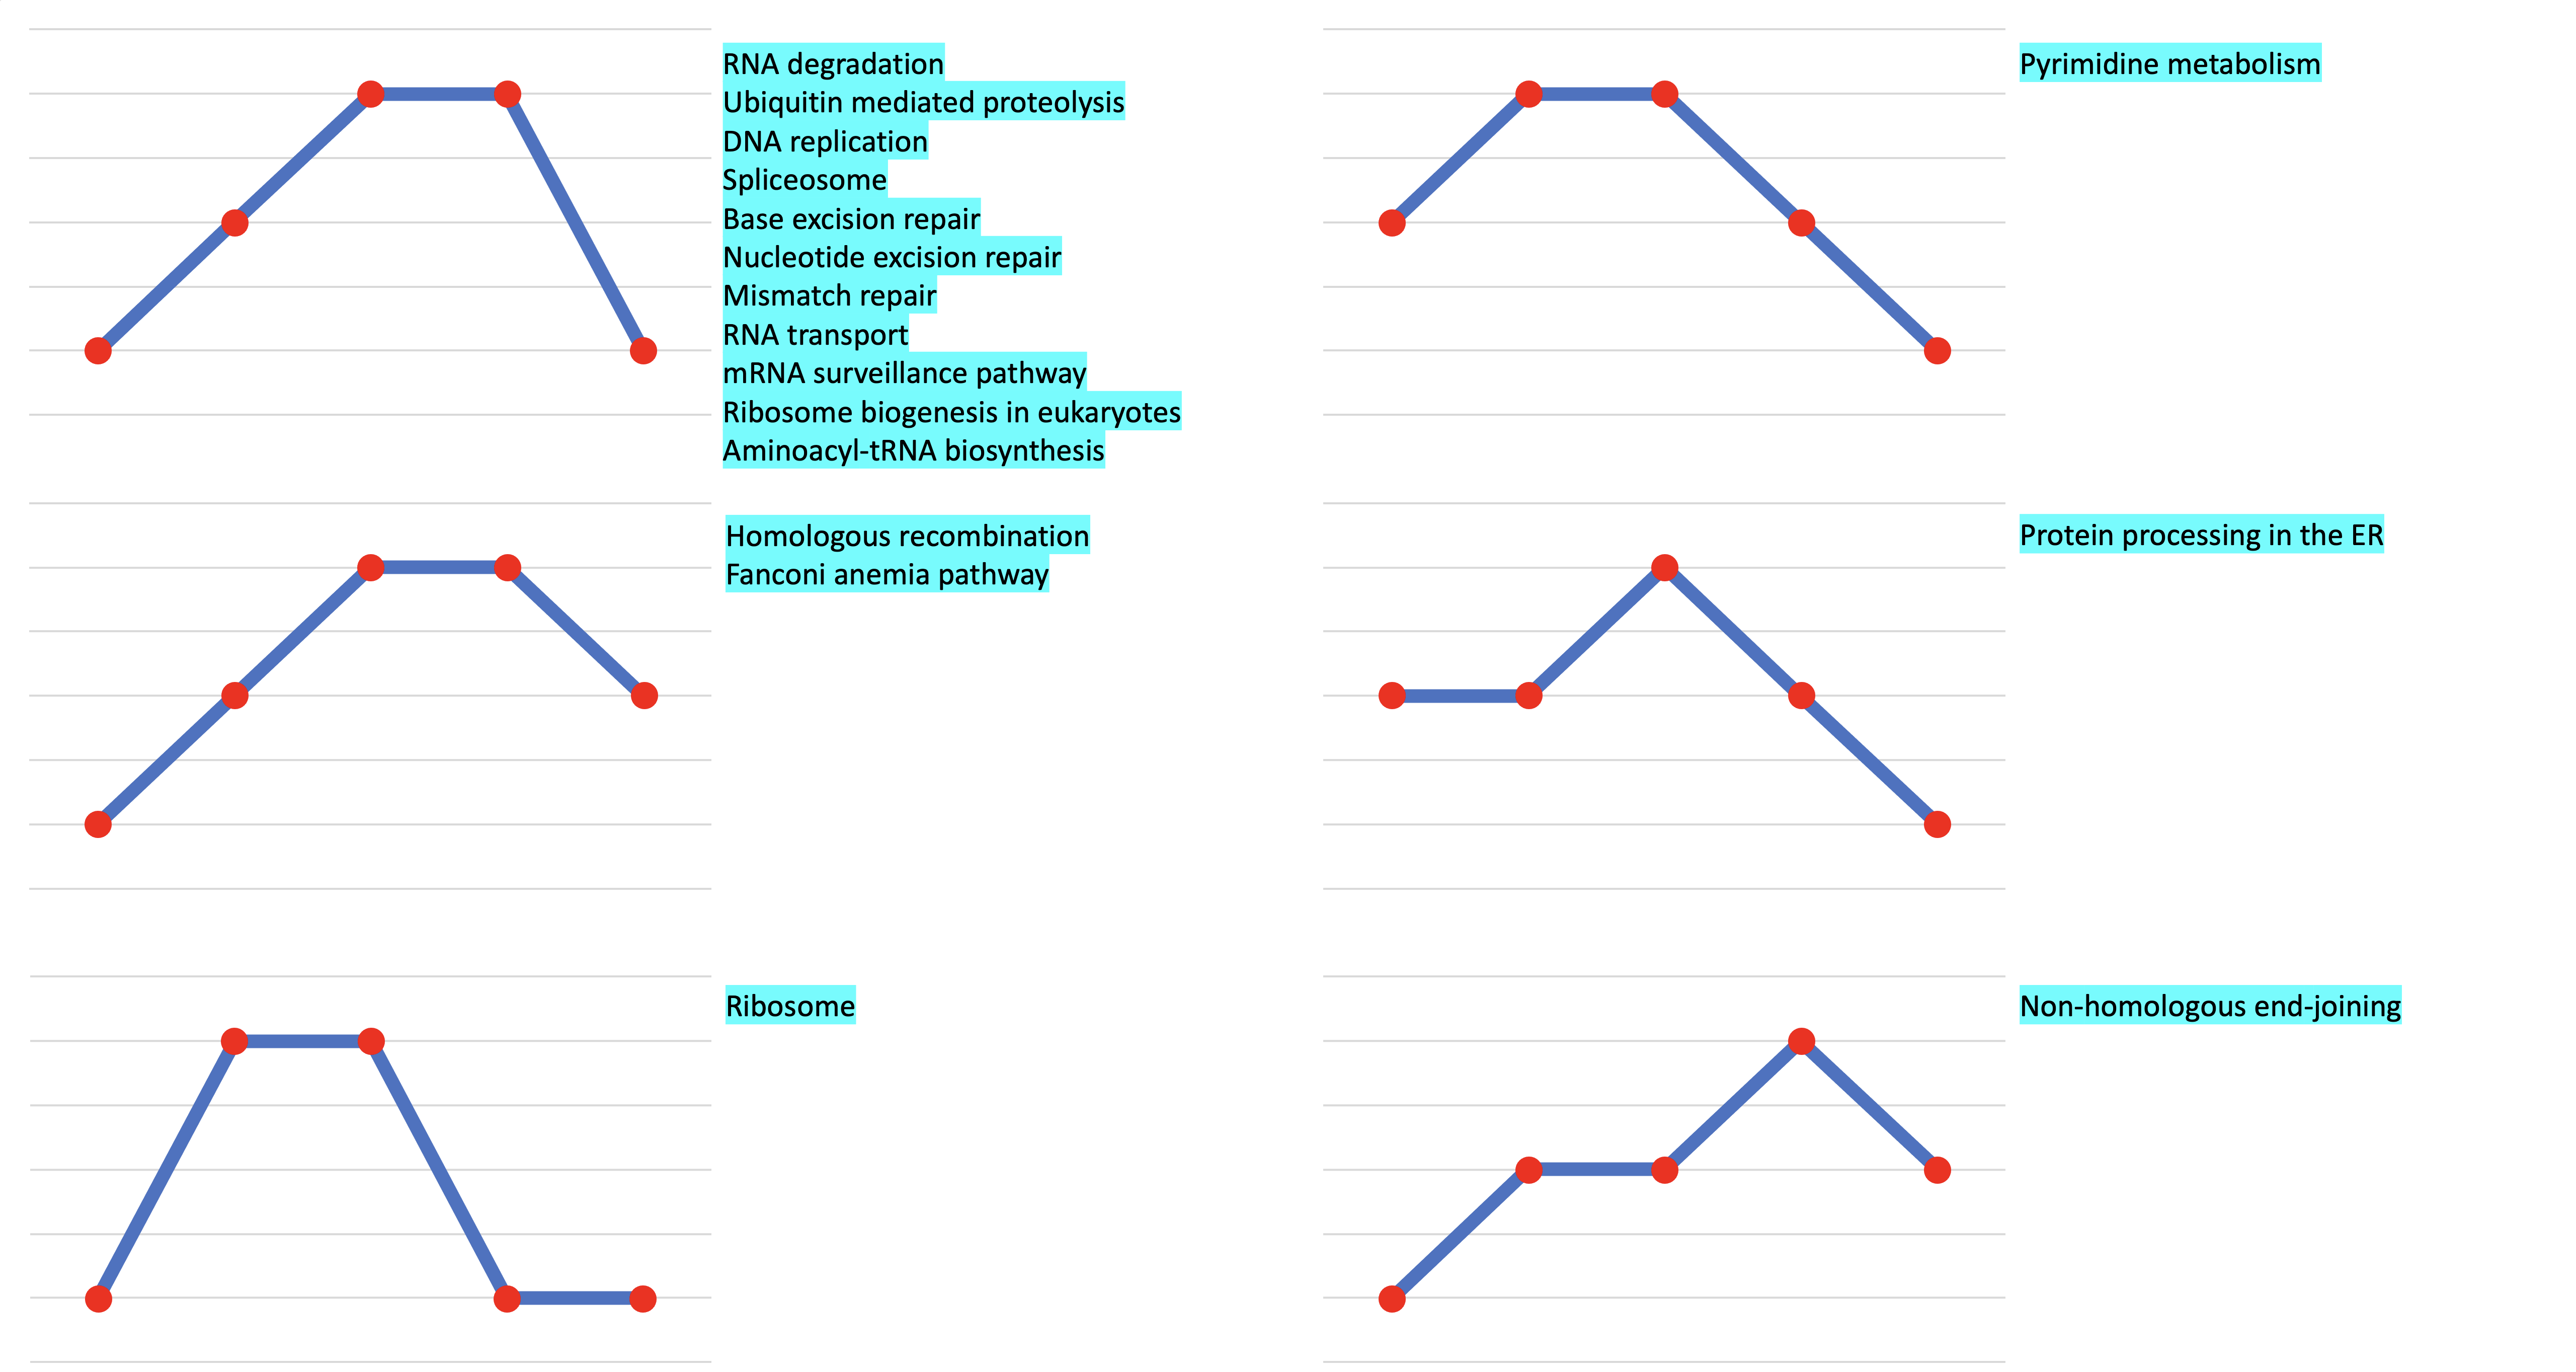

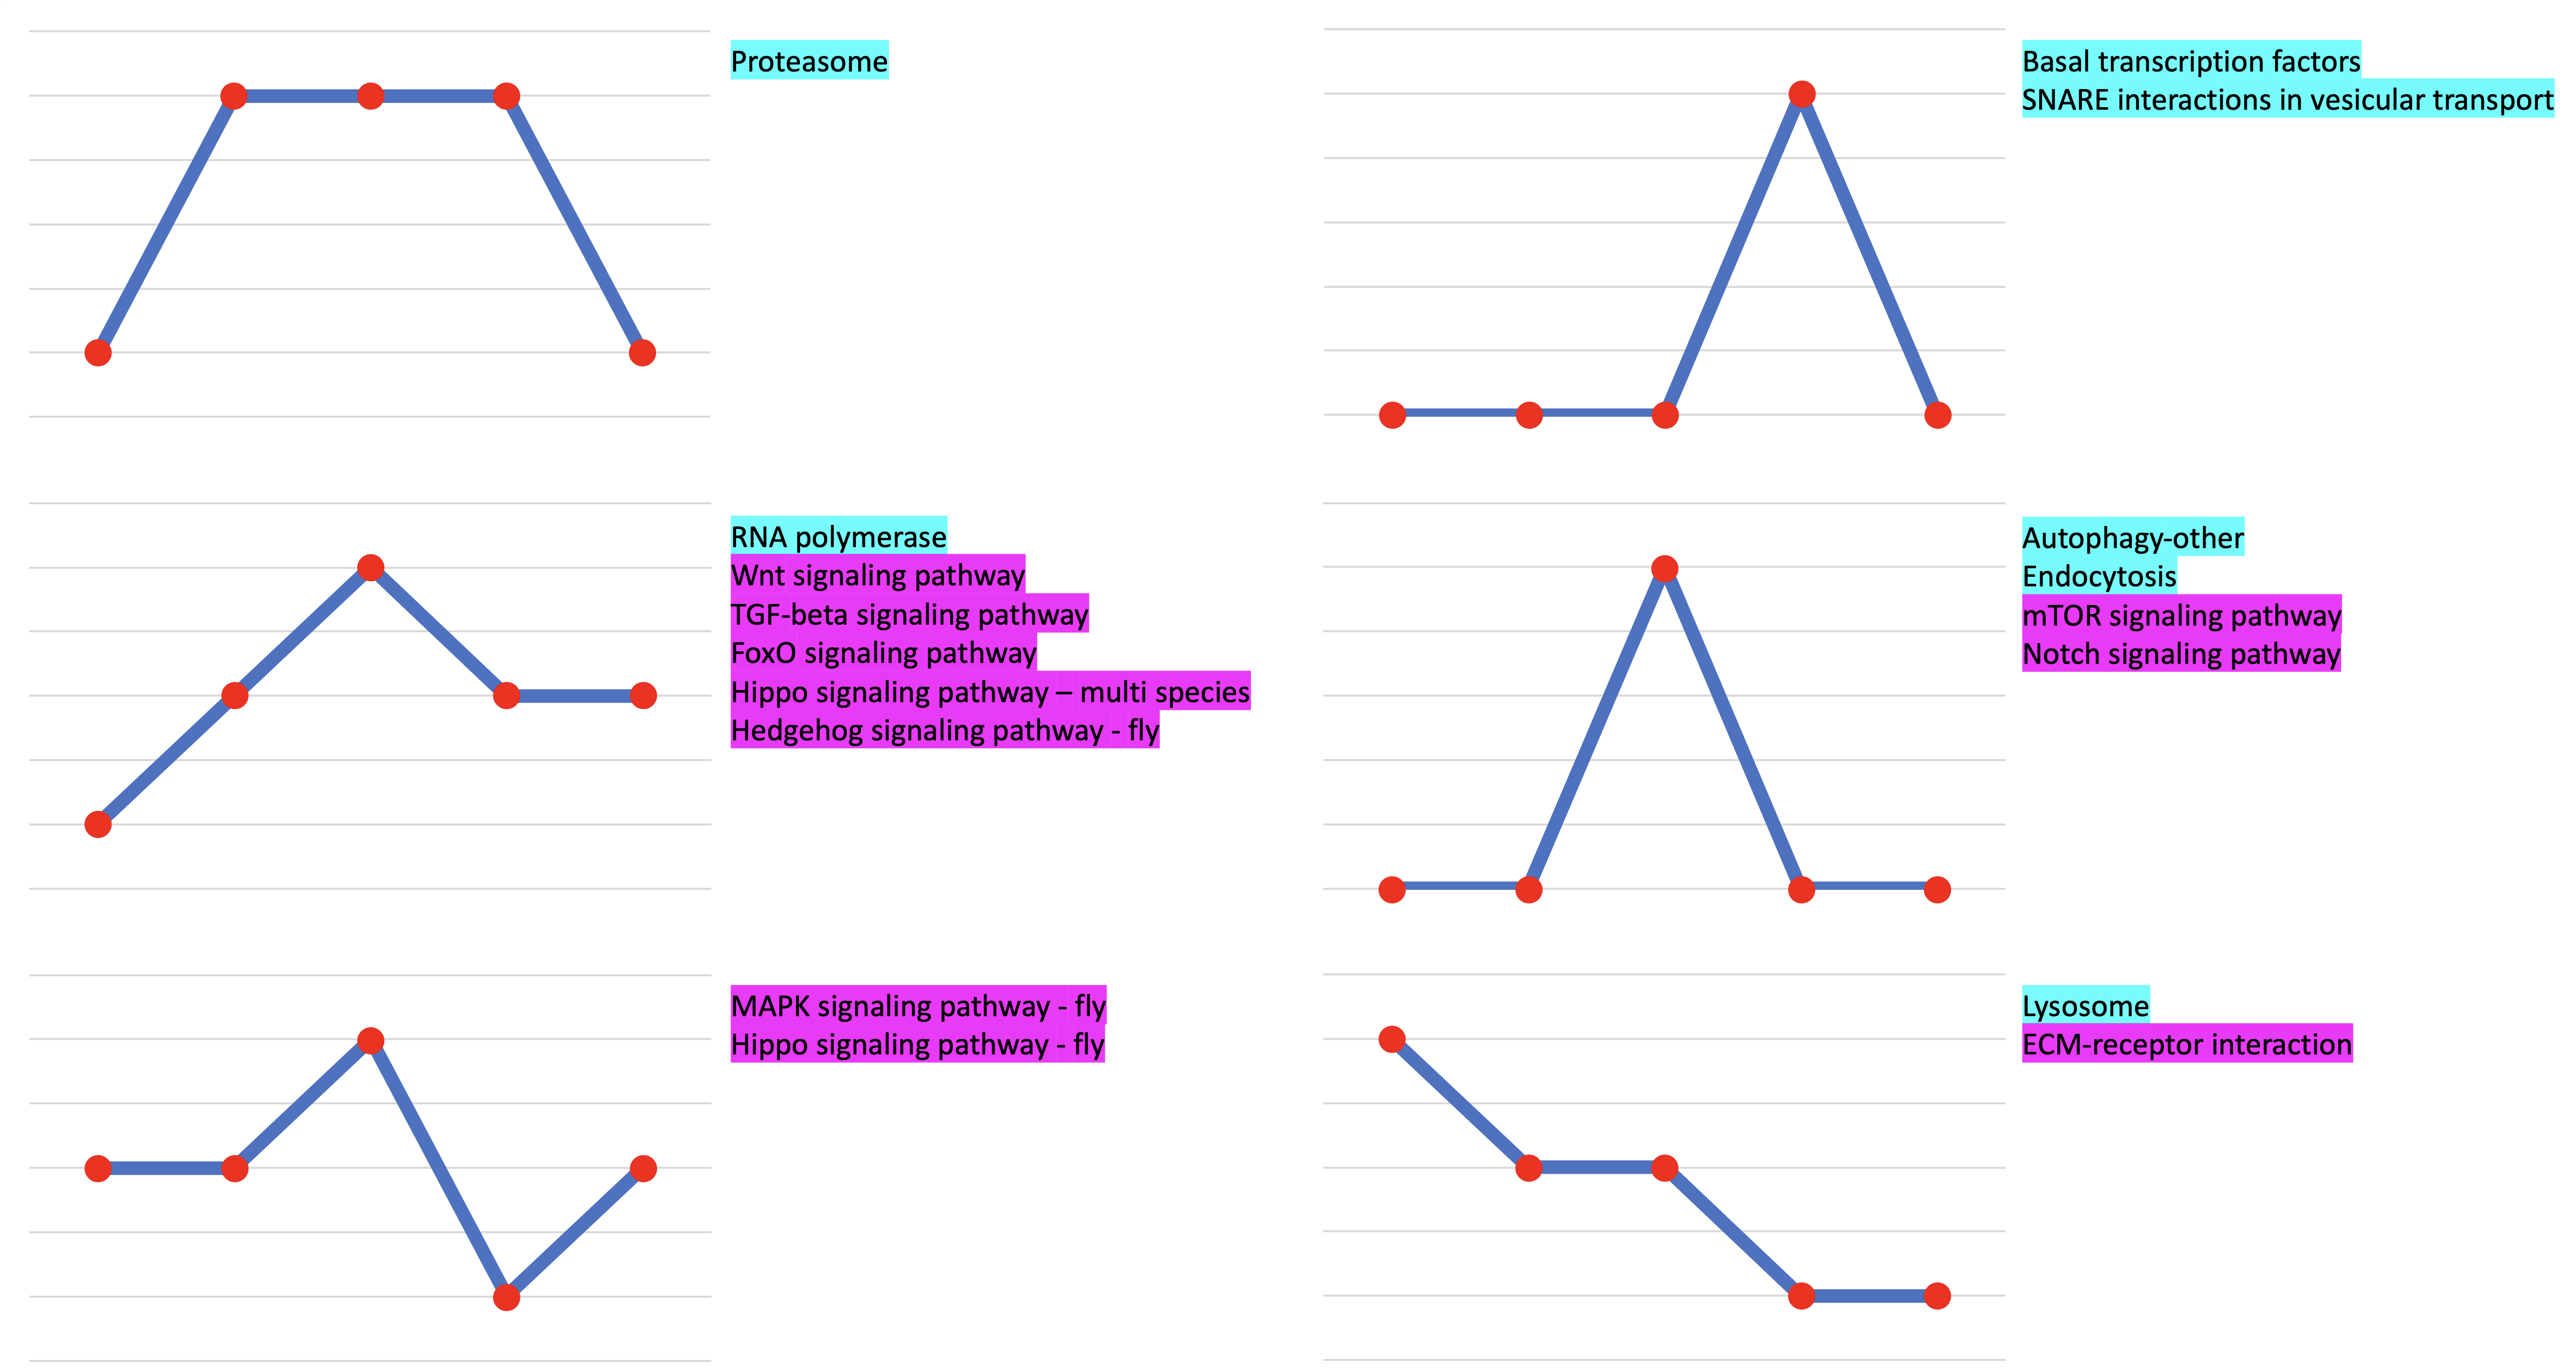

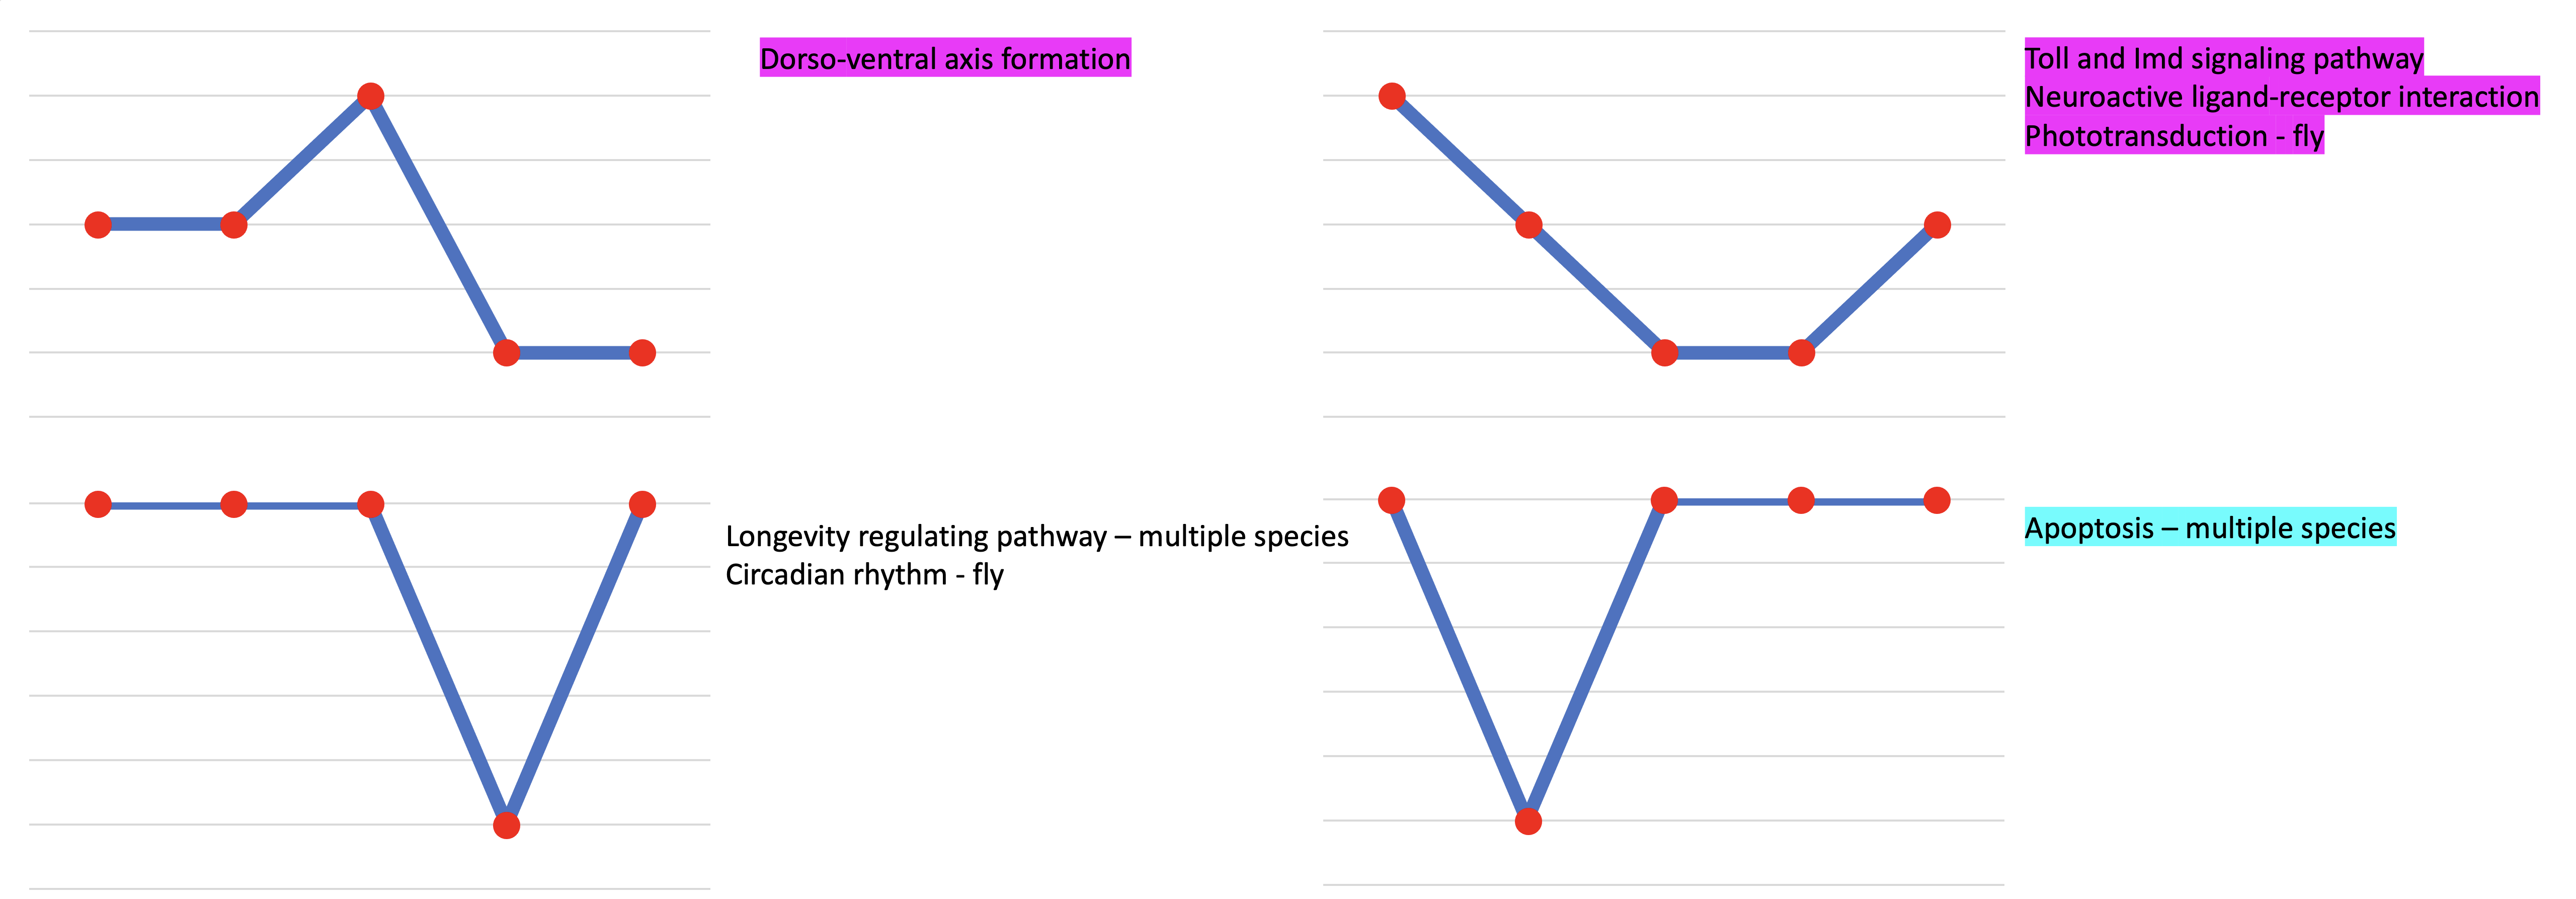


**
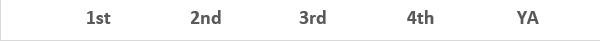

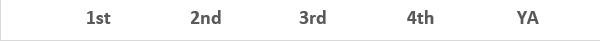
**

**Figure S7.** Enrichment dynamics of information processing and signaling KEGG pathways**.** Each panel is a graphical representation of each KEGG pathway portraying if it is enriched, non-significantly changed, or depleted (y-axis, based on data in **Dataset S4**) following GSEA analysis comparing each lifestage (chronologically along x-axis) to all other stages. KEGG pathways associated with each pattern are listed to the right of each graph. Color corresponds to the classification of each pathway (sky blue w/ black: information processing; purple w/ black: signaling; white w/ black: other).


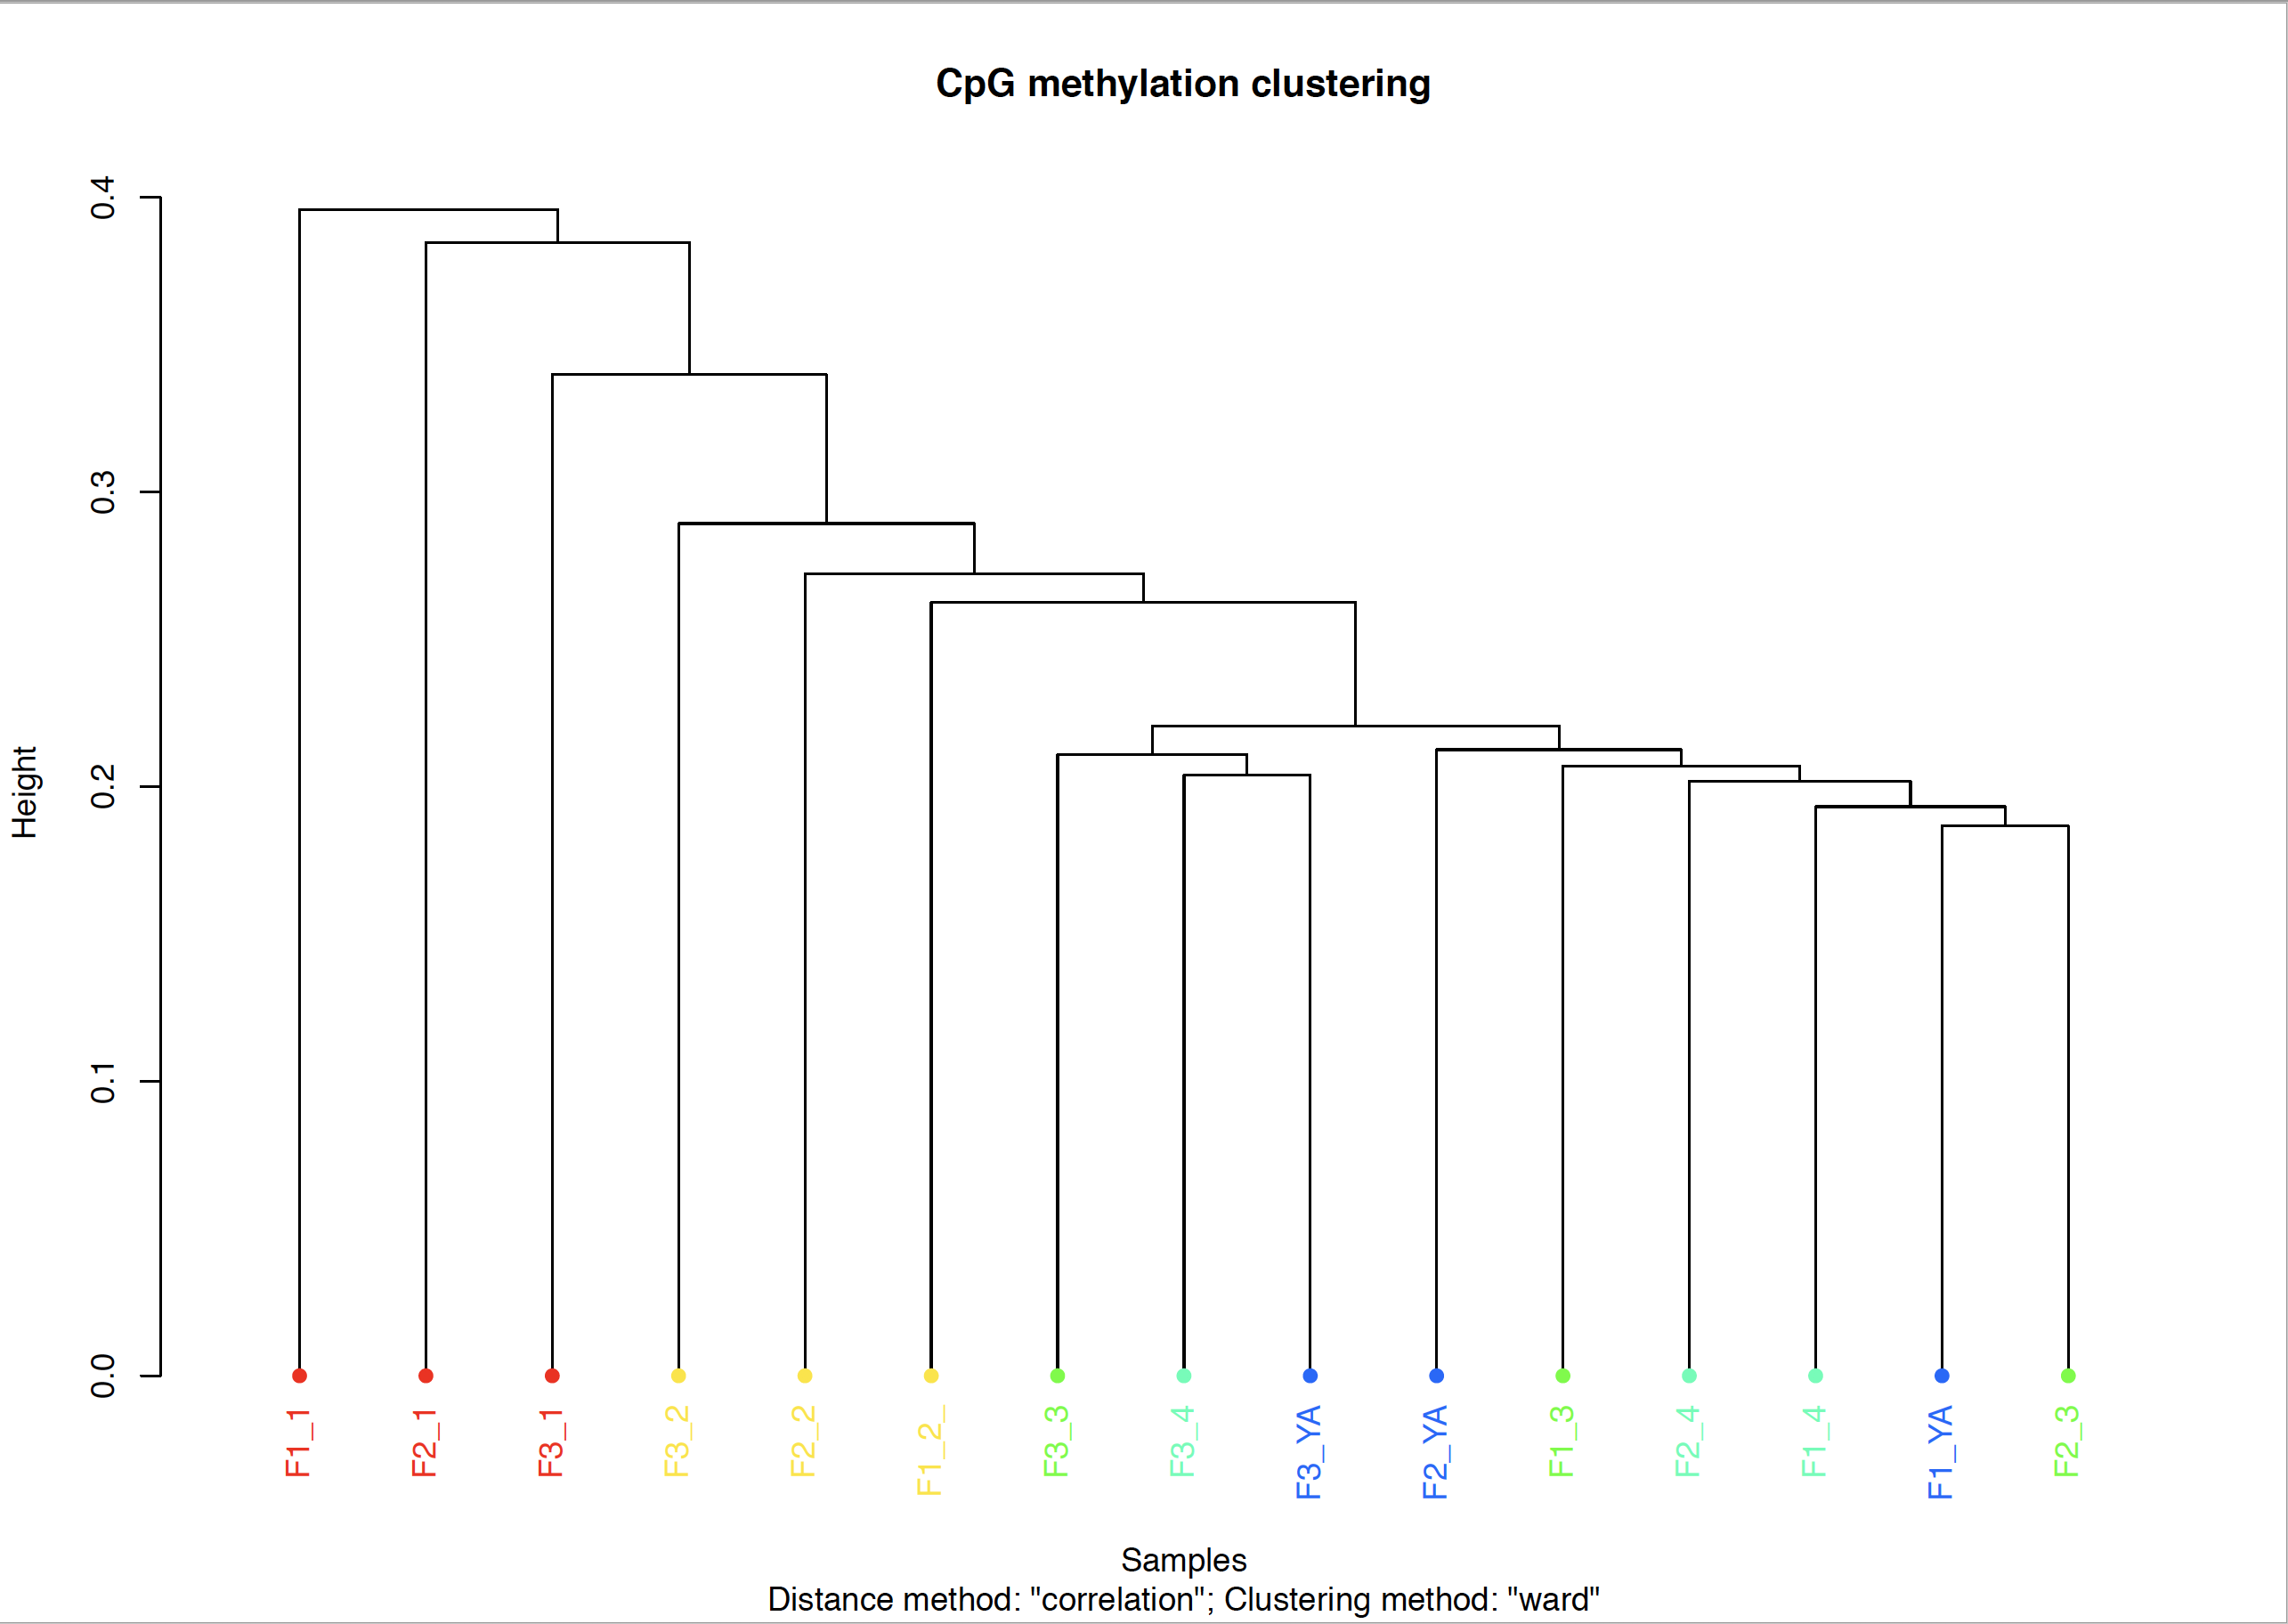


**Figure S8.** Hierarchical clustering of methylomes for each lifestage bacteriocyte sample.Bacteriocytes dissected from each developmental lifestage are represented by unique colors (red = 1st instar nymphs; yellow = 2nd instar nymphs; green = 3rd instar nymphs; turquoise = 4th instar nymphs; blue = young adults (YA)). Each lifestage includes three biological replicates (sub-lines) of aphids reared on fava.

**Table S1.** Statistical values associated with phenotypic analyses portrayed in **Figure 1**.

| **Bacteriocyte Cell Count** | | | | | | |
| --- | --- | --- | --- | --- | --- | --- |
| **Summary of Data** | | | | | | |
| **Bacteriocyte Dissected per Aphid (N = 60 per lifestage; with 20 from each of 3 sub-lines)** | | | | | | |
| **Lifestage** | | **1st** | **2nd** | **3rd** | **4th** | **YA** |
| **N** | | 60 | 60 | 60 | 60 | 60 |
| **∑X** | | 1330 | 1790 | 2402 | 2824 | 3059 |
| **Mean** | | 22.167 | 29.833 | 40.033 | 47.067 | 50.983 |
| **∑X2** | | 30382 | 54432 | 97203 | 135944 | 157819 |
| **Standard Deviation** | | 3.906 | 4.179 | 4.204 | 7.164 | 5.616 |
| **ANOVA** | | | | | | |
|  | | **Sum of Squares** | **df** | **Mean Square** | **F** | **Sig.** |
| **Between Groups** | | 34337.600 | 4 | 8584.400 | 322.093 | < 0.00001 |
| **Within Groups** | | 7862.317 | 295 | 26.652 |  |  |
| **Total** | | 42199.917 | 299 |  |  |  |
| **Bacteriocyte Cell Count - Post Hoc Tests-Multiple Comparisons-Tukey HSD** | | | | | | |
| **Lifestage** | | **Mean** | | **Mean Differences** | **Q** | **Sig.** |
|
| **1** | **2** | M1 = 22.17 | M2 = 29.83 | 7.67* | 11.50 | *p = 0.00000* |
|  | **3** | M1 = 22.17 | M3 = 40.03 | 17.87* | 26.81 | *p = 0.00000* |
|  | **4** | M1 = 22.17 | M4 = 47.07 | 24.90* | 37.36 | *p = 0.00000* |
|  | **5** | M1 = 22.17 | M5 = 50.98 | 28.82* | 43.24 | *p = 0.00000* |
| **2** | **3** | M2 = 29.83 | M3 = 40.03 | 10.20* | 15.30 | *p = 0.00000* |
|  | **4** | M2 = 29.83 | M4 = 47.07 | 17.23* | 25.86 | *p = 0.00000* |
|  | **5** | M2 = 29.83 | M5 = 50.98 | 21.15* | 31.73 | *p = 0.00000* |
| **3** | **4** | M3 = 40.03 | M4 = 47.07 | 7.03* | 10.55 | *p = 0.00000* |
|  | **5** | M3 = 40.03 | M5 = 50.98 | 10.95* | 16.43 | *p = 0.00000* |
| **4** | **5** | M4 = 47.07 | M5 = 50.98 | 3.92* | 5.88 | *p = 0.00000* |
| * The mean difference is significant at the 0.05 level. | | | | | | |
|  |  |  |  |  |  |  |
| **qPCR- Buchnera titer** | | | | | | |
| **qPCR ANOVA** | | | | | | |
|  | | **Sum of Squares** | **df** | **Mean Square** | **F** | **Sig.** |
| **Between Groups** | | 175683.623 | 4 | 43920.906 | 9.2 | 0.002 |
| **Within Groups** | | 47729.198 | 10 | 4772.920 |  |  |
| **Total** | | 223412.822 | 14 |  |  |  |
| **qPCR-Buchnera titer - Post Hoc Tests-Multiple Comparisons-Tukey HSD** | | | | | | |
| **(I) Lifestage** | **(J) Lifestage** | **Mean Differences (I_J)** | **Std. Error** | **Sig.** | **95% Confidence Interval** | |
| **Lower Bound** | **Upper Bound** |
| **1** | **2** | 208.55* | 56.41 | 0.027 | 22.91 | 394.2 |
|  | **3** | 274.12* | 56.41 | 0.005 | 88.48 | 459.77 |
|  | **4** | 281.47* | 56.41 | 0.004 | 95.83 | 467.12 |
|  | **5** | 282.39* | 56.41 | 0.004 | 96.75 | 468.04 |
| **2** | **1** | -208.55* | 56.41 | 0.027 | -394.2 | -22.91 |
|  | **3** | 65.57 | 56.41 | 0.771 | -120.07 | 251.22 |
|  | **4** | 72.92 | 56.41 | 0.701 | -112.72 | 258.57 |
|  | **5** | 73.84 | 56.41 | 0.692 | -111.81 | 259.49 |
| **3** | **1** | -274.12* | 56.41 | 0.005 | -459.77 | -88.48 |
|  | **2** | -65.57 | 56.41 | 0.771 | -251.22 | 120.07 |
|  | **4** | 7.35 | 56.41 | 1.000 | -178.29 | 193 |
|  | **5** | 8.27 | 56.41 | 1.000 | -177.38 | 193.92 |
| **4** | **1** | -281.47* | 56.41 | 0.004 | -467.12 | -95.83 |
|  | **2** | -72.92 | 56.41 | 0.701 | -258.57 | 112.72 |
|  | **3** | -7.35 | 56.41 | 1.000 | -193 | 178.3 |
|  | **5** | 0.92 | 56.41 | 1.000 | -184.73 | 186.56 |
| **5** | **1** | -282.39* | 56.41 | 0.004 | -468.04 | -96.75 |
|  | **2** | -73.84 | 56.41 | 0.692 | -259.49 | 111.81 |
|  | **3** | -8.27 | 56.41 | 1.000 | -193.92 | 177.38 |
|  | **4** | -0.92 | 56.41 | 1.000 | -186.56 | 184.73 |
| * The mean difference is significant at the 0.05 level. | | | | | | |
|  |  |  |  |  |  |  |
| **DNA sequencing- Buchnera titer** | | | | | | |
| **Sequencing ANOVA** | | | | | | |
|  | | **Sum of Squares** | **df** | **Mean Square** | **F** | **Sig.** |
| **Between Groups** | | 3.256 | 4 | 0.814 | 20.674 | 0.000 |
| **Within Groups** | | 0.394 | 10 | 0.039 |  |  |
| **Total** | | 3.649 | 14 |  |  |  |
| **Sequencing-Buchnera titer - Post Hoc Tests-Multiple Comparisons-Tukey HSD** | | | | | | |
| **(I) Lifestage** | **(J) Lifestage** | **Mean Differences (I_J)** | **Std. Error** | **Sig.** | **95% Confidence Interval** | |
| **Lower Bound** | **Upper Bound** |
| **1** | **2** | 0.90* | 0.16 | 0.002 | 0.37 | 1.43 |
|  | **3** | 1.15* | 0.16 | 0.000 | 0.61 | 1.68 |
|  | **4** | 1.28* | 0.16 | 0.000 | 0.75 | 1.81 |
|  | **5** | 1.17* | 0.16 | 0.000 | 0.63 | 1.7 |
| **2** | **1** | -0.90* | 0.16 | 0.002 | -1.43 | -0.37 |
|  | **3** | 0.24 | 0.16 | 0.580 | -0.29 | 0.78 |
|  | **4** | 0.38 | 0.16 | 0.212 | -0.16 | 0.91 |
|  | **5** | 0.27 | 0.16 | 0.506 | -0.27 | 0.8 |
| **3** | **1** | -1.15* | 0.16 | 0.000 | -1.68 | -0.61 |
|  | **2** | -0.24 | 0.16 | 0.580 | -0.78 | 0.29 |
|  | **4** | 0.13 | 0.16 | 0.917 | -0.4 | 0.67 |
|  | **5** | 0.02 | 0.16 | 1.000 | -0.51 | 0.55 |
| **4** | **1** | -1.28* | 0.16 | 0.000 | -1.81 | -0.75 |
|  | **2** | -0.38 | 0.16 | 0.212 | -0.91 | 0.16 |
|  | **3** | -0.13 | 0.16 | 0.917 | -0.67 | 0.4 |
|  | **5** | -0.11 | 0.16 | 0.954 | -0.65 | 0.42 |
| **5** | **1** | -1.17* | 0.16 | 0.000 | -1.7 | -0.63 |
|  | **2** | -0.27 | 0.16 | 0.506 | -0.8 | 0.27 |
|  | **3** | -0.02 | 0.16 | 1.000 | -0.55 | 0.51 |
|  | **4** | 0.11 | 0.16 | 0.954 | -0.42 | 0.65 |
| * The mean difference is significant at the 0.05 level. | | | | | | |

**Table S2.** Total RNA-Seq reads sequenced, quality trimmed, and successfully mapped as pairs for each bacteriocyte tissue sample.

| **RNA-Seq samples** | | **Total reads (PE150)** | **Trimmed reads** | **Mapped reads *A. pisum*** | **%** | **Mapped reads *Buchnera*** | **%** |
| --- | --- | --- | --- | --- | --- | --- | --- |
| **Fava sub-lines** | | | | | | |  |
| F1 1st instar | | 20,044,659 | 20,002,471 | 13,163,626 | 65.81 | 4,766,589 | 23.83 |
| F1 2nd instar | | 20,726,556 | 20,696,513 | 14,303,360 | 69.11 | 4,124,815 | 19.93 |
| F1 3rd instar | | 19,439,418 | 19,400,227 | 11,777,878 | 60.71 | 4,058,527 | 20.92 |
| F1 4th instar | | 20,868,881 | 20,819,591 | 14,213,535 | 68.27 | 2,973,038 | 14.28 |
| F1 young adult | | 21,710,142 | 21,664,515 | 13,260,850 | 61.21 | 3,587,644 | 16.56 |
| F2 1st instar | | 19,526,698 | 19,488,588 | 11,907,527 | 61.10 | 4,798,090 | 24.62 |
| F2 2nd instar | | 19,661,441 | 19,624,513 | 12,149,536 | 61.91 | 5,051,350 | 25.74 |
| F2 3rd instar | | 18,902,875 | 18,867,282 | 12,469,387 | 66.09 | 3,147,063 | 16.68 |
| F2 4th instar | | 20,946,301 | 20,900,497 | 14,308,480 | 68.46 | 3,187,326 | 15.25 |
| F2 young adult | | 19,318,650 | 19,278,114 | 10,363,914 | 53.76 | 3,923,096 | 20.35 |
| F3 1st instar | | 20,328,509 | 20,289,731 | 12,705,430 | 62.62 | 5,072,433 | 25.00 |
| F3 2nd instar | | 20,397,325 | 20,351,520 | 11,873,077 | 58.34 | 5,708,601 | 28.05 |
| F3 3rd instar | | 18,404,276 | 18,363,822 | 11,414,952 | 62.16 | 2,962,084 | 16.13 |
| F3 4th instar | | 20,101,853 | 20,050,058 | 13,363,364 | 66.65 | 3,434,575 | 17.13 |
| F3 young adult | | 18,435,884 | 18,398,813 | 12,652,864 | 68.77 | 2,305,371 | 12.53 |
| **Average** | **19,920,898** | | **19,879,750** | **12,661,852** | **63.66** | **3,940,040** | **19.80** |
| F1, F2, and F3 denote 3 biological replicates of fava feeding aphids. | | | | | | | |

**Table S3.** Symbiotic genes significantly differentially expressed1 (E), spliced1 (S) and/or methylated2 (M) within bacteriocyte tissue throughout nymphal development. Red colored cells with an E represent downregulated transcripts. Red colored cells with an S represent downregulated isoforms. Blue colored cells with an E represent upregulated transcripts. Blue colored cells with an S represent upregulated isoforms. Red text with a M- represents hypomethylated sites within a gene. Blue text with a M+ represents hypermethylated sites within a gene. Split cells represent a single lifestage comparison that contains more than one differentially regulated scenario described above.

| **Gene ID** | **Annotation** | **1st vs. Rest** | **2nd vs. 1st** | **2nd vs. Rest** | **3rd vs. 2nd** | | **3rd vs. Rest** | **4th vs. 3rd** | | **4th vs. Rest** | **YA vs. 4th** | **YA vs. Rest** |
| --- | --- | --- | --- | --- | --- | --- | --- | --- | --- | --- | --- | --- |
| LOC100159667 | ApGLNT1 |  | M- | M- | M+ | |  | E | |  | M+ | M+ |
| LOC100168251 | ApNEAAT1 |  |  |  |  | |  | E | |  |  |  |
| LOC100159441 | trehalose transporter Tret1 | M- |  |  |  | |  | E | |  |  |  |
| LOC100161392 | Slc16a10; MCT-Organic acid transporters; monocarboxylic acid transporters | S |  |  |  | |  |  | |  | M+ |  |
| LOC100161575 | MCT-uncharacterized protein | M- |  |  |  | |  |  | | M+ |  | M+ |
| LOC100159134 | MCT, pyruvate cytoplasm transporter |  |  |  |  | |  | E | |  |  |  |
| LOC100162256 | MCT, pyruvate cytoplasm transporter | M- |  |  |  | |  | E | | S |  |  |
| LOC100168581 | MCT, pyruvate cytoplasm transporter |  |  |  |  | |  | M+ | |  |  |  |
| LOC100161178 | L-threonine aldolase 2 | E | E |  |  | |  |  | |  |  |  |
| LOC100159628 | SHMT1; serine hydroxymethyltransferase |  |  |  |  | |  | M- | | M- | M+ |  |
| LOC100167020 | C-1-tetrahydrofolate synthase, cytoplasmic | M- |  |  |  | |  |  | |  | S |  |
| LOC100161583 | aminomethyltransferase, mitochondrial |  |  |  |  | |  | E | |  |  |  |
| LOC100162105 | pyruvate carboxylase, mitochondrial |  |  |  | M+ | |  | E | M- |  |  |  |
| LOC100163785 | acetyl coenzyme A synthase; Accoas |  | E |  |  | |  |  | |  |  |  |
| LOC100163010 | NADP-dependent malic enzyme |  |  | M- |  | |  |  | |  |  |  |
| LOC100165091 | NADP-dependent malic enzyme |  |  |  |  | |  |  | |  | M- |  |
| LOC100160700 | phosphoenolpyruvate carboxykinase [GTP]-like |  |  |  |  | |  | E | |  | E |  |
| LOC100159375 | glucose-6-phosphate 1-dehydrogenase |  |  |  |  | |  | E | S |  |  |  |
| LOC100165291 | 6-phosphogluconolactonase |  |  |  |  | |  |  | |  | M+ |  |
| LOC100167791 | 6-phosphogluconate dehydrogenase, decarboxylating |  |  |  | M+ | |  | E | |  | M- |  |
| LOC100169008 | ribose-5-phosphate isomerase-like | M- |  |  |  | |  | M- | |  |  |  |
| LOC100159257 | 5'-nucleotidase |  |  |  | M+ | |  |  | |  |  |  |
| LOC100160663 | 5'-nucleotidase |  | E |  |  | |  |  | |  |  |  |
| LOC100162698 | 5'-nucleotidase |  | E |  |  | |  |  | |  |  |  |
| LOC100164432 | 5'-nucleotidase |  |  |  |  | |  | E | |  |  |  |
| LOC100165508 | 5'-nucleotidase |  |  |  |  | |  |  | |  | M+ |  |
| LOC100166892 | 5'-nucleotidase |  |  |  | M- | |  | E | M- |  |  |  |
| LOC100169565 | 5'-nucleotidase |  | E |  |  | |  |  | |  |  |  |
| LOC100163139 | Aspartate transaminase |  |  |  |  | |  |  | |  | M+ |  |
| LOC100166971 | Phenylalanine 4-monooxygenase; PAH |  |  |  |  | |  | E | |  |  |  |
| LOC100159560 | Cystathionase-like |  |  |  | E | |  | E | |  |  |  |
| LOC100158883 | GltS; GOGAT |  | M- | M- | M+ | |  |  | |  |  |  |
| LOC100163589 | Phosphoserine transaminase |  |  |  |  | |  | E | |  |  |  |
| LOC100160265 | Asparagine synthase |  | E |  | E | |  |  | |  |  |  |
| LOC100161762 | Asparagine synthase | M- |  |  |  | |  |  | |  |  |  |
| LOC100160139 | GS2; glutamine synthetase 2 |  |  |  | M- | |  | E | |  |  |  |
| LOC100164179 | Asparaginase |  |  |  |  | |  | E | |  |  |  |
| LOC100160095 | Asparaginase |  |  |  |  | |  | E | | E |  |  |
| LOC100167144 | Asparaginase |  |  |  |  | |  | E | |  |  |  |
| LOC100161811 | Sugar transporters; similar to AGAP007667-PA |  |  |  |  | |  | E | | E |  |  |
| LOC100161021 | Sugar transporters; similar to AGAP007484-PA |  |  |  |  | |  | E | |  |  |  |
| LOC100159728 | Sugar transporter; similar to CG10960 CG10960-PB |  |  |  |  | |  | E | |  |  |  |
| LOC100169115 | Sugar transporter; similar to AGAP007484-PA |  |  |  |  | |  | E | |  |  |  |
| LOC100169458 | Sugar transporter |  |  |  |  | |  | E | |  |  |  |
| LOC100163428 | Sugar transporter |  |  |  |  | |  | E | |  |  |  |
| LOC100162864 | Organic acid transporter; sodium-dependent inorganic; similar to AGAP007732-PA |  |  |  | E | |  |  | |  | M- | M- |
| LOC100169257 | Organic acid transporter; similar to sodium/solute symporter |  |  |  | M+ | |  |  | |  |  |  |
| LOC100167082 | Organic acid transporter; similar to organic cation transporter, partial |  |  |  |  | |  | E | |  |  |  |
| LOC100168178 | amino acid transporter; cationic AA transmembrane |  |  |  |  | |  | E | |  |  |  |
| LOC100161944 | amino acid transporter; AA transmembrane transporter |  |  |  |  | |  | E | |  |  |  |
| LOC100159188 | amino acid transporter, cationic AA transmembrane |  |  |  |  | |  | E | |  |  |  |
| LOC100164077 | amino acid transporter, cationic AA transmembrane |  |  |  |  | |  | E | |  |  |  |
| LOC100162704 | active transporters; sodium/nucleoside cotransporter; similar to AGAP005989-PA |  |  |  |  | |  | E | |  |  |  |
| LOC100162391 | Vha16; V-type proton ATPase 16 kDa proteolipid subunit; active transporters |  |  | M- | M+ | |  | E | |  |  |  |
| LOC100161987 | VhaAC39; vacuolar H[+]-ATPase C39 subunit; active transporters |  |  |  | M- | |  | E | | M+ |  |  |
| LOC100159835 | active transporters; similar to sulfate transporter |  |  |  | E | |  |  | |  |  |  |
| LOC100164052 | active transporters; similar to sulfate transporter |  |  |  |  | |  | E | |  |  |  |
| LOC100159703 | active transporters; similar to sodium/solute symporter |  |  |  |  | |  | E | |  |  |  |
| LOC100158812 | active transporters; similar to CG6293 CG6293-PA |  |  |  |  | |  | E | |  |  |  |
| LOC100161355 | active transporters; similar to ATPase |  |  |  |  | |  | S | |  | S |  |
| LOC100168499 | active transporters; similar to aquaporin |  | S |  |  | |  |  | |  |  |  |
| LOC100162446 | active transporters; similar to AGAP007119-PA |  |  |  |  | |  | M+ | |  |  |  |
| LOC100159664 | active transporters; similar to 2-oxoglutarate carrier protein |  |  |  | E | M+ |  | E | |  |  |  |
| LOC100165727 | Active transporters; major facilitator superfamily domain-containing protein 5 | M- |  |  |  | |  |  | |  |  |  |
| LOC100163312 | active transporters |  |  |  | M+ | |  |  | |  |  |  |
| LOC100165130 | active transporters; equilibrative nucleoside transporter; similar to AGAP003892-PA | M- |  |  |  | |  | M+ | |  |  |  |
| LOC100164565 | active transporters; abc transporter; similar to CG17646 CG17646-PA |  |  |  |  | |  | E | |  |  |  |

1FDR corrected p-value ≤ 0.01, normalized read count fold change ≥ 2.0x.

2≥ 25% change in methylation level, FDR-adjusted p-value ≤ 0.05, & minimum coverage of 10 reads.

**Table S4.** Developmental genes significantly differentially expressed1 (E), spliced1 (S) and/or methylated2 (M) within bacteriocyte tissue throughout nymphal development. Red colored cells with an E represent downregulated transcripts. Red colored cells with an S represent downregulated isoforms. Blue colored cells with an E represent upregulated transcripts. Blue colored cells with an S represent upregulated isoforms. Red text with a M- represents hypomethylated sites within a gene. Blue text with a M+ represents hypermethylated sites within a gene. Split cells represent a single lifestage comparison that contains more than one differentially regulated scenario described above.

| **Gene ID** | **Annotation** | **1st vs. Rest** | **2nd vs. 1st** | | **2nd vs. Rest** | **3rd vs. 2nd** | | **3rd vs. Rest** | **4th vs. 3rd** | | **4th vs. Rest** | **YA vs. 4th** | **YA vs. Rest** |
| --- | --- | --- | --- | --- | --- | --- | --- | --- | --- | --- | --- | --- | --- |
| LOC100165462 | 3-hydroxy-3-methylglutaryl-CoA reductase |  |  | |  |  | |  | E | M+ |  |  |  |
| LOC100168447 | abdominal-A |  |  | |  |  | |  | E | |  |  |  |
| LOC100160786 | Acj6 |  |  | |  |  | |  | E | |  |  |  |
| LOC100167815 | activin receptor type I, thickveins |  |  | |  | M+ | |  | M- | |  |  |  |
| LOC100163334 | activin receptor type II, punt |  |  | |  | M+ | |  |  | |  |  |  |
| LOC100166146 | adenomatous polyposis coli gene product |  |  | |  | M+ | |  | M+ | |  | M- |  |
| LOC100168951 | AP50 |  |  | |  |  | |  | E | |  | M+ |  |
| LOC100159100 | apterous 1; LIM homeobox protein 2/9 |  |  | |  |  | |  | E | |  |  |  |
| LOC100165521 | Araucan |  |  | |  |  | |  | E | |  |  |  |
| LOC100163166 | argos 1 |  |  | |  |  | |  | E | |  |  |  |
| LOC100162227 | argos 4 |  |  | |  | M+ | |  |  | |  |  |  |
| LOC100162045 | armadillo 2, beta-catenin |  |  | |  | M+ | |  |  | |  |  |  |
| LOC100160542 | atypical Protein Kinase C |  |  | |  |  | |  | M- | |  |  |  |
| LOC100164086 | Auxillin | M- |  | |  |  | |  |  | |  |  |  |
| LOC100167569 | Axin | M- |  | |  | M+ | |  |  | |  | M- |  |
| LOC100165411 | belle, PL10 |  |  | |  |  | |  | M+ | |  |  |  |
| LOC100164682 | Bicaudal D |  |  | |  |  | | M+ | M- | |  | M+ |  |
| LOC100169393 | big brain | E | E | |  |  | |  | E | M- |  | M- |  |
| LOC100159482 | blimp1 |  |  | |  | E | |  |  | |  |  |  |
| LOC100163030 | bone morphogenetic protein 3 like |  | E | |  |  | |  | E | |  |  |  |
| LOC100161424 | Boule |  |  | |  | M+ | |  | M- | |  | M+ |  |
| LOC100163098 | Brahma |  |  | |  | M+ | |  | M- | |  | M+ |  |
| LOC100165880 | Bunched |  |  | |  |  | |  | M- | |  |  |  |
| LOC100158965 | C-terminal Binding Protein | M- | M+ | |  |  | |  |  | |  | M- |  |
| LOC100165906 | cactus; Cact | M- |  | |  | M+ | | M+ |  | |  |  |  |
| LOC100169483 | Canoe |  |  | |  | M+ | |  | E | M- | S |  |  |
| LOC100168358 | Capncollar |  |  | |  |  | |  | E | |  | M- |  |
| LOC100161789 | Castor |  |  | |  |  | |  | E | |  |  |  |
| LOC100161988 | Cut |  |  | | S | E | | S |  | |  |  |  |
| LOC100162579 | Cyclin B3 | M- |  | |  |  | |  | M+ | |  |  |  |
| LOC100159237 | Cyclin E |  |  | |  |  | |  |  | |  | M- |  |
| LOC100167680 | Dachshund |  |  | |  | E | |  |  | |  |  |  |
| LOC100168053 | dally-like 3 |  |  | |  |  | |  | E | |  |  |  |
| LOC100169367 | Daughters against dpp 2, SMAD6/7 family, partial |  |  | |  |  | |  | E | |  |  |  |
| LOC100169367 | Daughters against dpp, SMAD6/7 family |  |  | |  |  | |  | E | |  |  |  |
| LOC100168935 | decapentaplegic 2 |  | E | |  |  | |  |  | |  |  |  |
| LOC100168426 | decapentaplegic 3 |  |  | |  |  | |  | M+ | |  |  |  |
| LOC100161376 | Deformed |  |  | |  |  | |  | E | |  |  |  |
| LOC100160703 | Delta |  |  | |  |  | |  | E | |  |  |  |
| LOC100163482 | disc proliferation abnormal |  |  | |  |  | |  | M+ | |  |  |  |
| LOC100166217 | Dishevelled |  |  | |  | M+ | |  | M- | |  |  |  |
| LOC100161127 | Dispatched | M- |  | |  | M+ | |  |  | |  |  |  |
| LOC100163362 | divergent Protein Phosphatase 1 catalytic subunit |  |  | |  |  | |  | E | |  |  |  |
| LOC100161727 | divergent Protein Phosphatase 2A regulatory subunit A |  |  | |  | M+ | |  | E | |  |  |  |
| LOC100164483 | Division abnormally delayed (dally) |  |  | |  |  | |  | E | |  |  |  |
| LOC100164092 | dorsal B |  |  | |  |  | |  | M+ | |  |  |  |
| LOC100162550 | E(spl) region transcript mgamma |  |  | |  |  | |  | E | | E |  |  |
| LOC100169086 | E(spl) region transcript mgamma 2 |  |  | |  |  | |  | E | |  |  |  |
| LOC100163786 | E2F transcription factor | M- |  | |  | M+ | |  |  | |  |  |  |
| LOC100159071 | E3 ubiquitin-protein ligase CBL | M- |  | |  |  | |  |  | |  |  |  |
| LOC100161053 | E78, NR1E1 |  |  | |  | M- | |  |  | |  |  |  |
| LOC100168609 | Ebi | M- |  | |  |  | |  |  | |  |  |  |
| LOC100160393 | EcR | M- |  | |  |  | | M+ |  | |  |  |  |
| LOC100165732 | empty spiracles |  |  | |  |  | |  | E | |  |  |  |
| LOC100168575 | ERR, NR3B4 | M- |  | |  | M+ | |  | E | M- |  | M- |  |
| LOC100168368 | Extradenticle |  |  | |  | M+ | |  |  | |  |  |  |
| LOC100166190 | Fasciclin 1 |  |  | |  | M+ | |  |  | |  |  |  |
| LOC100163782 | FGFR2 |  |  | |  |  | |  |  | |  | M- |  |
| LOC100160830 | Fringe |  |  | |  |  | |  |  | |  | M+ |  |
| LOC100166935 | Frizzled |  |  | |  | M+ | |  |  | |  | M- |  |
| LOC100162853 | frizzled 2 |  |  | |  |  | |  |  | |  | E |  |
| LOC100162562 | Ftz-f1, NR5A3 |  |  | |  |  | |  | E | M- |  |  |  |
| LOC100159372 | glass bottom boat |  |  | |  |  | | M+ |  | |  | M+ |  |
| LOC100163852 | gooseberry; paired box protein 3/7 |  | E | |  |  | |  | E | |  |  |  |
| LOC100160060 | Gustavus |  |  | |  |  | |  | E | M+ |  |  |  |
| LOC100169375 | Hairy/E(spl)-related |  |  | |  | E | |  |  | |  |  |  |
| LOC100165590 | Hedgehog |  |  | |  |  | |  | E | |  |  |  |
| LOC100158939 | hedgehog receptor patched | E |  | |  |  | |  |  | |  |  |  |
| LOC100162918 | Hephaestus |  |  | |  |  | |  |  | |  | M+ |  |
| LOC100158950 | Hgtx |  | E | |  |  | |  |  | |  |  |  |
| LOC100168732 | Hnf4, NR2A4 |  |  | |  |  | |  | E | M+ |  |  |  |
| LOC100161671 | homeobox protein engrailed | M+ | E | M- |  |  | |  |  | |  |  |  |
| LOC100165397 | Hr39, NR5B1 |  |  | |  | M+ | |  |  | |  |  |  |
| LOC100163128 | Hr78, NR2D1 |  |  | |  |  | |  | M- | |  |  |  |
| LOC100162643 | hu li tai shao |  |  | | M- | M+ | |  |  | |  |  |  |
| LOC100168182 | Inscuteable |  |  | |  | E | |  | E | |  |  |  |
| LOC100164597 | kekkon 1b |  |  | |  | M+ | |  | M- | |  | M+ |  |
| LOC100158695 | kekkon 4 | E | E | |  |  | |  |  | |  |  |  |
| LOC100160075 | kekkon 5 |  |  | |  | M+ | |  |  | |  | M+ |  |
| LOC100163283 | Kruppel |  |  | |  |  | |  | E | |  |  |  |
| LOC100163757 | ladybird early |  |  | |  |  | |  |  | |  | M+ | M+ |
| LOC100164476 | Lag1 |  | M+ | |  |  | |  |  | |  | M+ |  |
| LOC100158984 | Lim1 |  |  | |  | E | |  |  | |  |  |  |
| LOC100164426 | Lim3 |  |  | | E | E | |  |  | |  |  |  |
| LOC100166469 | Lmxb |  |  | |  | E | |  |  | |  |  |  |
| LOC100163985 | Low density lipoprotein related receptor (LRP), arrow | M- |  | |  | M+ | | M+ | E | |  |  |  |
| LOC100165019 | MAPKK hemipterous |  |  | |  |  | |  |  | |  | M+ |  |
| LOC100167677 | Medea 2, SMAD4 | M- |  | |  |  | |  |  | |  |  |  |
| LOC100162614 | Medea 4, SMAD4 | M- |  | |  | M+ | | M+ | M- | |  |  |  |
| LOC100169614 | Mediator subunit 12, Kohtalo |  |  | |  |  | |  | E | |  |  |  |
| LOC100163203 | mind bomb 1 | M- | M+ | |  | M+ | |  | E | |  |  |  |
| LOC100169212 | Mirror |  |  | |  |  | |  | E | |  |  |  |
| LOC100169512 | Mothers against dpp 2, SMAD |  |  | |  |  | |  | M+ | |  |  |  |
| LOC100162414 | nemo like kinase |  | M+ | |  | M+ | |  |  | |  |  |  |
| LOC100168154 | Neuralized |  |  | |  |  | |  | E | |  |  |  |
| LOC100167793 | NK7.1 |  |  | |  |  | |  | E | |  |  |  |
| LOC100164109 | Notch | M+ | E | M- |  |  | |  | E | |  |  |  |
| LOC100164863 | Nubbin |  | M+ | |  | M+ | |  |  | |  | M+ |  |
| LOC100169415 | Nuclear factor I homolog |  |  | |  | M- | |  |  | |  | E |  |
| LOC100169478 | O-fucosyltransferase 1 |  |  | |  | E | |  |  | |  |  |  |
| LOC100158731 | Onecut |  |  | |  | E | |  |  | |  |  |  |
| LOC100159487 | Optix | E | E | |  |  | |  | M+ | |  |  |  |
| LOC100158703 | Optomotor-blind |  |  | |  |  | |  | E | |  |  |  |
| LOC100161874 | Ovo |  |  | |  | M+ | |  | M- | |  |  |  |
| LOC100169297 | Pelle |  | M+ | |  |  | |  |  | |  |  |  |
| LOC100159948 | Pipsqueak |  |  | |  |  | |  |  | |  | M+ |  |
| LOC100167269 | Piwi | M- |  | | M- | M+ | | M+ |  | |  |  |  |
| LOC100169134 | Proboscipedia |  |  | |  | E | |  |  | |  |  |  |
| LOC100160397 | prospero |  |  | |  | E | |  | E | |  |  |  |
| LOC100160881 | Protein Kinase C 98E |  |  | |  | M- | |  |  | |  | M+ |  |
| LOC100144917 | Protein Phosphatase 2A catalytic subunit |  |  | |  | M+ | |  |  | |  |  |  |
| LOC100159278 | Protein Phosphatase 2A regulatory subunit B (widerborst) |  |  | |  | M+ | |  |  | |  |  |  |
| LOC100159140 | Pumilio | M- | M+ | |  | M- | |  | M- | |  |  |  |
| LOC100161154 | Pygopus |  |  | |  |  | |  |  | | M- |  |  |
| LOC100167520 | Rad21 | M- | M+ | |  |  | |  | E | |  |  |  |
| LOC100160505 | Ran-Binding Protein 2 | M- |  | | M- |  | |  | M- | |  |  |  |
| LOC100165668 | Ran-Binding Protein 3 |  |  | |  |  | |  | M- | |  |  |  |
| LOC100169138 | RAP GTPase Activating Protein |  |  | |  |  | |  | M+ | |  |  |  |
| LOC100166893 | RAS Associated Protein 1 | M- |  | |  |  | |  | E | |  |  |  |
| LOC100159640 | Receptor Tyrosine Kinase-like Orphan Receptor 2 | M- |  | |  | M+ | |  |  | |  |  | M+ |
| LOC100162200 | Rhomboid 4-a |  |  | |  | M+ | |  | M- | |  |  |  |
| LOC100162164 | Rhomoboid 5 |  | E | |  |  | | M+ | M- | |  |  | M+ |
| LOC100169150 | Saxophone | M- |  | |  | M+ | | M+ | E | | E | M- |  |
| LOC100159477 | Scabrous | E | E | |  |  | |  |  | |  |  |  |
| LOC100164500 | seven up, NR2F1 |  |  | |  |  | |  | E | |  |  |  |
| LOC100162339 | Sevenless |  | M+ | |  | M+ | |  |  | |  |  |  |
| LOC100159241 | Shaven |  | M- | |  | E | |  |  | |  |  |  |
| LOC100161569 | short gastrulation, chodrin family |  |  | |  | M+ | |  | E | |  |  |  |
| LOC100164522 | sloppy-paired |  | E | |  |  | |  | E | |  |  |  |
| LOC100164536 | Smox, SMAD2/3 family |  |  | |  |  | |  |  | |  | M+ |  |
| LOC100159579 | Son of sevenless |  |  | |  | M- | |  |  | |  |  |  |
| LOC100164548 | SoxNeuro |  | E | |  |  | |  | E | |  |  |  |
| LOC100162252 | spatzle 2 |  |  | |  | E | |  |  | |  |  |  |
| LOC100166308 | spindle E |  |  | |  | M+ | |  | M- | |  |  |  |
| LOC100166090 | sprinter, Evenness interrupted, evi |  |  | |  |  | |  |  | |  | M+ |  |
| LOC100159469 | strawberry notch | M- |  | | M- | M+ | |  | M+ | |  |  |  |
| LOC100159135 | Suppressor of deltex | M- | M- | | M- |  | |  |  | |  |  |  |
| LOC100168944 | suppressor of hairless 2 | M- | M+ | |  |  | |  |  | |  |  |  |
| LOC100164993 | Syntaxin 1A; Syx1a |  | M+ | |  | M+ | |  | M- | |  |  |  |
| LOC100160905 | Tailup |  |  | |  |  | |  | E | |  |  |  |
| LOC100163481 | Target of Rapamycin/ | M- |  | |  |  | |  | M- | |  | M+ | M+ |
| LOC100158739 | Toll | M- |  | |  |  | |  |  | |  |  |  |
| LOC100165656 | Tolloid |  |  | |  | E | M+ |  | E | |  |  |  |
| LOC100161937 | torso-like related |  |  | |  |  | |  | E | |  |  |  |
| LOC100162653 | transcription factor daughterless | M- |  | |  | M+ | |  | M- | |  |  |  |
| LOC100159612 | Tropomyosin 2 |  |  | |  | E | |  |  | |  | E |  |
| LOC100167378 | twin of eyeless |  |  | |  |  | |  | E | |  |  |  |
| LOC100169090 | Twins | M- |  | |  |  | |  | M- | |  |  |  |
| LOC100160123 | Twist |  | E | |  |  | |  | E | |  |  |  |
| LOC100160569 | Ultrabithorax |  |  | |  |  | |  | M+ | |  | M- |  |
| LOC100164958 | Ultraspiracle, NR2B4; Usp | M- | M+ | |  | M+ | |  |  | |  |  |  |
| LOC100159418 | vasa 2, Apvasa2 | M- |  | |  | M+ | |  |  | |  |  |  |
| LOC100167816 | vasa 4, Apvasa4 |  |  | | M- | M+ | |  | M+ | | M+ | M+ |  |
| LOC100162071 | wingless, Wnt1 |  | E | |  |  | |  | E | |  |  |  |
| LOC100164094 | Wnt11 |  |  | |  |  | |  |  | |  | M+ |  |
| LOC100159117 | Wnt16 |  |  | |  | M+ | |  |  | |  |  |  |
| LOC100168810 | Wnt7 | E | E | |  | E | |  | E | |  |  |  |
| LOC100159863 | WntA |  |  | |  |  | |  | E | |  |  |  |
| LOC100164616 | Wunen, Ppap2a | M- |  | |  |  | | M+ |  | |  |  |  |
| LOC100167539 | Yan, aop | M- |  | |  |  | |  | E | M- |  |  |  |
| LOC100167266 | zinc-finger homeodomain protein 1 |  |  | |  |  | |  | E | |  |  |  |

1FDR corrected p-value ≤ 0.01, normalized read count fold change ≥ 2.0x.

2≥ 25% change in methylation level, FDR-adjusted p-value ≤ 0.05, & minimum coverage of 10 reads.

**Table S5.** Total whole genome bisulfite sequencing reads successfully mapped as pairs to the *A. pisum*, *Buchnera*, and *Lambda* genomes, and total read coverage for the whole *A. pisum* genome for each bacteriocyte tissue sample.

| **DNA Samples** | **Total reads** | **Trimmed reads** | **Mapped reads *A. pisum*** | **Mapping efficiency (%)** | **Genome coverage *A. pisum*** | **Mapped reads *Buchnera*** | **Mapping efficiency (%)** | **Mapped reads Lambda phage** | **Mapping efficiency (%)** |
| --- | --- | --- | --- | --- | --- | --- | --- | --- | --- |
| **Fava sub-line** |  |  |  |  |
| F1 1st instar | 141,880,921 | 131,473,193 | 22,917,017 | 17.4% | 12.7x | 48,346,388 | 36.8% | 144,256 | 0.1% |
| F1 2nd instar | 142,217,659 | 133,687,702 | 38,328,512 | 28.7% | 21.2x | 31,559,902 | 23.6% | 92,983 | 0.1% |
| F1 3rd instar | 161,296,618 | 152,234,551 | 49,213,474 | 32.3% | 27.3x | 29,486,989 | 19.4% | 91,475 | 0.1% |
| F1 4th instar | 152,429,208 | 143,562,967 | 52,444,351 | 36.5% | 29.1x | 20,548,582 | 14.3% | 117,751 | 0.1% |
| F1 young adult | 184,244,863 | 173,151,378 | 62,085,929 | 35.9% | 34.4x | 26,561,782 | 15.3% | 106,518 | 0.1% |
| F2 1st instar | 134,194,757 | 125,580,201 | 25,424,301 | 20.2% | 14.1x | 41,562,137 | 33.1% | 74,984 | 0.0% |
| F2 2nd instar | 160,824,306 | 151,434,183 | 39,318,746 | 26.0% | 21.8x | 40,440,264 | 26.7% | 74,984 | 0.0% |
| F2 3rd instar | 204,539,405 | 192,434,722 | 59,899,078 | 31.1% | 33.2x | 40,971,637 | 21.3% | 67,592 | 0.0% |
| F2 4th instar | 168,393,377 | 157,731,428 | 55,005,503 | 34.9% | 30.5x | 26,267,836 | 16.7% | 91,791 | 0.1% |
| F2 young adult | 182,844,095 | 170,924,087 | 48,025,326 | 28.1% | 26.6x | 41,065,898 | 24.0% | 94,150 | 0.1% |
| F3 1st instar | 163,235,511 | 153,069,041 | 32,830,088 | 21.4% | 18.2x | 49,446,658 | 32.3% | 120,578 | 0.1% |
| F3 2nd instar | 147,508,240 | 138,659,018 | 41,954,177 | 30.3% | 23.3x | 29,172,923 | 21.0% | 98,222 | 0.1% |
| F3 3rd instar | 159,078,746 | 149,439,063 | 50,541,456 | 33.8% | 28.0x | 26,830,056 | 18.0% | 55,473 | 0.0% |
| F3 4th instar | 154,990,684 | 145,338,488 | 48,604,881 | 33.4% | 26.9x | 26,444,175 | 18.2% | 83,994 | 0.1% |
| F3 young adult | 145,460,730 | 136,405,138 | 48,664,842 | 35.7% | 27.0x | 22,703,445 | 16.6% | 93,736 | 0.1% |
| **Average** | **160,209,274.7** | **150,341,677** | **45,017,179** | **29.7%** | **25.0x** | **33,427,245** | **22.5%** | **93,899** | **0.1%** |

F1, F2, and F3 denote 3 biological replicates of fava feeding aphids.

**Table S6.** Total number of C’s analyzed, coverage per C in the *A. pisum* genome, total number of C’s methylated (and their context), and per base coverage and methylation statistics for each bacteriocyte tissue sample.

| **DNA Samples** | **Total C’s Analyzed** | **Coverage per C in genome** | **Total methylated C’s in CpG** | | **mC’s CpG context** | | **mC’s CHG context** | | | | **mC’s CHH context** | **mCpG w/ >10x Read Coverage** | **Mean Read Coverage per base** | **Mean Methylation per base** |
| --- | --- | --- | --- | --- | --- | --- | --- | --- | --- | --- | --- | --- | --- | --- |
| **Fava sub-line** |  |  | |  | |  | | |
| F1 1st instar | 1,027,767,713 | 7.5x | 8,952,832 | | 4.5% | | | 2.2% | | 2.6% | | 7,391,262 | 14.16 | 3.89 |
| F1 2nd instar | 1,725,616,708 | 12.6x | 16,216,930 | | 4.8% | | | 2.2% | | 2.6% | | 15,868,601 | 17.08 | 4.62 |
| F1 3rd instar | 2,192,393,884 | 16.0x | 20,752,731 | | 4.9% | | | 2.2% | | 2.6% | | 19,304,491 | 19.16 | 4.98 |
| F1 4th instar | 2,337,716,363 | 17.0x | 21,916,103 | | 4.9% | | | 2.3% | | 2.6% | | 20,047,540 | 19.93 | 5.01 |
| F1 young adult | 2,764,882,641 | 20.1x | 25,701,097 | | 4.9% | | | 2.2% | | 2.6% | | 21,679,233 | 22.59 | 5.05 |
| F2 1st instar | 1,138,293,903 | 8.3x | 9,979,224 | | 4.5% | | | 2.3% | | 2.6% | | 8,910,370 | 14.52 | 4.04 |
| F2 2nd instar | 1,762,743,024 | 12.8x | 16,073,956 | | 4.7% | | | 2.2% | | 2.5% | | 16,170,903 | 17.13 | 4.54 |
| F2 3rd instar | 2,677,298,392 | 19.5x | 25,174,612 | | 4.9% | | | 2.2% | | 2.6% | | 21,387,123 | 22.10 | 5.07 |
| F2 4th instar | 2,459,308,160 | 17.9x | 22,834,569 | | 4.8% | | | 2.2% | | 2.6% | | 20,532,129 | 20.90 | 4.96 |
| F2 young adult | 2,136,653,384 | 15.5x | 19,908,445 | | 4.9% | | | 2.3% | | 2.6% | | 18,918,974 | 18.92 | 4.89 |
| F3 1st instar | 1,477,573,733 | 10.8x | 12,998,232 | | 4.5% | | | 2.2% | | 2.6% | | 13,251,049 | 16.07 | 4.22 |
| F3 2nd instar | 1,858,701,863 | 13.5x | 16,712,836 | | 4.7% | | | 2.2% | | 2.5% | | 16,750,044 | 17.40 | 4.64 |
| F3 3rd instar | 2,191,813,600 | 15.9x | 21,410,395 | | 5.3% | | | 2.3% | | 2.6% | | 18,463,652 | 19.02 | 5.32 |
| F3 4th instar | 2,181,008,652 | 15.9x | 19,863,739 | | 4.7% | | | 2.2% | | 2.6% | | 19,283,600 | 19.38 | 4.75 |
| F3 young adult | 2,192,148,117 | 16.0x | 19,940,344 | | 4.6% | | | 2.3% | | 2.7% | | 19,377,506 | 19.64 | 4.73 |
| **Average** | **2,008,261,342** | **14.6x** | **18,562,403** | | **4.8%** | | | **2.2%** | | **2.6%** | | **17,155,765** | **18.53** | **4.71** |

F1, F2, and F3 denote 3 biological replicates of fava feeding aphids.

**Table S7.** Total high-quality whole genome bisulfite sequencing reads successfully mapped as pairs, and total number of C’s analyzed in the *Buchnera* and *Lambda* genome, and total number of C’s methylated (and their context) for each bacteriocyte tissue sample.

| **DNA Samples** | **Total C’s Analyzed** | **Total mCpG** | **mC’s CpG context** | **mC’s CHG context** | **mC’s CHH context** |
| --- | --- | --- | --- | --- | --- |
| **Fava sub-line** | ***Buchnera*** | | | | |
| F1 1st instar | 1,964,785,506 | 4,537,697 | 2.0% | 2.3% | 2.8% |
| F1 2nd instar | 1,284,831,197 | 2,974,471 | 1.9% | 2.3% | 2.7% |
| F1 3rd instar | 1,190,712,175 | 2,748,567 | 2.0% | 2.3% | 2.8% |
| F1 4th instar | 836,127,940 | 1,967,756 | 2.0% | 2.3% | 2.8% |
| F1 young adult | 1,075,367,916 | 2,491,696 | 2.0% | 2.3% | 2.8% |
| F2 1st instar | 1,683,729,313 | 3,908,219 | 2.0% | 2.3% | 2.8% |
| F2 2nd instar | 1,649,076,682 | 3,792,323 | 1.9% | 2.3% | 2.8% |
| F2 3rd instar | 1,669,435,298 | 3,869,278 | 2.0% | 2.3% | 2.8% |
| F2 4th instar | 1,069,281,706 | 2,504,177 | 2.0% | 2.3% | 2.8% |
| F2 young adult | 1,654,944,008 | 3,818,967 | 2.0% | 2.3% | 2.8% |
| F3 1st instar | 2,011,241,537 | 4,692,413 | 2.0% | 2.3% | 2.8% |
| F3 2nd instar | 1,188,379,643 | 2,797,867 | 2.0% | 2.3% | 2.6% |
| F3 3rd instar | 1,074,290,468 | 2,519,563 | 2.0% | 2.3% | 2.8% |
| F3 4th instar | 1,068,809,282 | 2,472,388 | 2.0% | 2.4% | 2.8% |
| F3 young adult | 915,245,635 | 2,106,412 | 2.0% | 2.4% | 2.8% |
| **Average** | **1,355,750,554** | **3,146,786** | **2.0%** | **2.3%** | **2.8%** |
| **Fava sub-line** | ***Lambda*** | | | | |
| F1 1st instar | 10,753,584 | 60,126 | 2.2% | 2.3% | 2.6% |
| F1 2nd instar | 6,930,158 | 38,203 | 2.1% | 2.3% | 2.6% |
| F1 3rd instar | 6,791,678 | 37,973 | 2.2% | 2.3% | 2.6% |
| F1 4th instar | 905,420 | 48,974 | 2.2% | 2.3% | 2.6% |
| F1 young adult | 7,905,420 | 43,822 | 2.2% | 2.3% | 2.6% |
| F2 1st instar | 5,590,737 | 30,670 | 2.1% | 2.3% | 2.6% |
| F2 2nd instar | 5,590,737 | 30,670 | 2.1% | 2.3% | 2.6% |
| F2 3rd instar | 5,034,118 | 27,612 | 2.1% | 2.4% | 2.6% |
| F2 4th instar | 6,824,166 | 37,726 | 2.2% | 2.3% | 2.6% |
| F2 young adult | 6,968,708 | 38,709 | 2.2% | 2.3% | 2.6% |
| F3 1st instar | 8,962,913 | 49,266 | 2.2% | 2.3% | 2.6% |
| F3 2nd instar | 7,273,810 | 39,938 | 2.1% | 2.3% | 2.6% |
| F3 3rd instar | 3,801,033 | 20,968 | 2.2% | 2.4% | 2.7% |
| F3 4th instar | 6,245,997 | 34,981 | 2.2% | 2.3% | 2.6% |
| F3 young adult | 6,978,317 | 38,706 | 2.2% | 2.3% | 2.6% |
| **Average** | **6,437,120** | **38,556** | **2.2%** | **2.3%** | **2.6%** |

F1, F2, and F3 denote 3 biological replicates of fava feeding aphids.

**Table S8.** Number and direction of significant differentially methylated sites (DMS), and their average genomic location and distance to transcriptional start sites (TSS) from each sequential expression analysis comparison and from each lifestage specific expression analysis comparison. (N = 3 biological replicates per lifestage).

|  | **DMS1** | | **% of DMS overlapping each feature** | | | | **Distance of DMS from nearest TSS (bp)** | | | | | |
| --- | --- | --- | --- | --- | --- | --- | --- | --- | --- | --- | --- | --- |
| **Lifestage Comparison** | **Hypo2** | **Hyper2** | **Promoter** | **Exon** | **Intron** | **Inter-genic** | **Min.** | **1st Quartile** | **Median** | **Mean** | **3rd Quartile** | **Max.** |
| 2nd vs. 1st | 92 | 671 | 13 | 35 | 31 | 33 | 21 | 2066 | 4759 | 8934 | 10974 | 199413 |
| 3rd vs. 2nd | 526 | 2196 | 14 | 38 | 41 | 22 | 21 | 1774 | 4172 | 7240 | 8280 | 184291 |
| 4th vs. 3rd | 1548 | 695 | 15 | 32 | 38 | 31 | 3 | 1886 | 4472 | 8791 | 9194 | 167042 |
| YA vs. 4th | 584 | 589 | 17 | 37 | 40 | 25 | 17 | 1751 | 3942 | 7295 | 7559 | 132819 |
| 1st vs. Rest | 1756 | 85 | 15 | 46 | 36 | 20 | 16 | 1706 | 4002 | 7546 | 8655 | 199413 |
| 2nd vs. Rest | 320 | 324 | 15 | 36 | 30 | 34 | 49 | 1698 | 4332 | 7892 | 9728 | 97421 |
| 3rd vs. Rest | 22 | 269 | 11 | 40 | 41 | 22 | 122 | 1968 | 4084 | 6938 | 8320 | 74256 |
| 4th vs. Rest | 37 | 162 | 23 | 47 | 38 | 19 | 82 | 1167 | 3653 | 6402 | 7670 | 73098 |
| YA vs. Rest | 40 | 180 | 22 | 45 | 36 | 21 | 79 | 1194 | 4238 | 7303 | 9068 | 81141 |

1Significant if: ≥ 25% change in methylation level, FDR-adjusted p-value ≤ 0.05, & minimum coverage of 10 reads.

2Hypo- and hypermethylation is in reference to the older stage in the comparison relative to the younger stage in the comparison for sequential comparisons (e.g. 2nd in 1st vs 2nd) and to the individual stage in the comparison relative to all other stages (Rest) in the comparison for lifestage specific comparisons (e.g. 1st in 1st vs Rest).

**LEGENDS FOR SUPPLEMENTAL DATASETS**

**Dataset S1 (separate file). Raw and Normalized Read Counts (.xlsx workbook).** Gene and transcript read count matrix generated via Ballgown and normalized (TMM) via EdgeR. Each row represents a different gene/transcript (Col. A) and Col. D – Col. R represent raw/normalized read counts for that gene/transcript associated with each of the 15 RNAseq samples. Corresponding LOC # and gene names have also been included in Col. B and Col. C.

**Dataset S2 (separate file). Differentially Expressed Genes (.xlsx workbook).** Genes found to be differentially expressed (padj: ≤ 0.01 & fold change ≥ 2x) between two sequential lifestages or specific to each lifestage after TMM normalization. Each row represents a different gene, represented by its gene_id, LOC #, and gene name in the first three columns. The next 6-15 columns represent the normalized read counts for that gene associated with each of the biological replicates of the lifestage samples being compared. The last 5 columns represent statistical values used to determine significance (padj, log2Fold change, pvalue, fold change, log10padj).

**Dataset S3 (separate file). Differentially Expressed Isoforms (.xlsx workbook).** Isoforms found to be differentially expressed (padj: ≤ 0.01 & fold change ≥ 2x) between two sequential lifestages or specific to each lifestage after TMM normalization. Each row represents a different isoform, represented by its transcript_id, LOC #, and gene name in the first three columns. The next 6-15 columns represent the normalized read counts for that isoform associated with each of the biological replicates of the lifestage samples being compared. The last 5 columns represent statistical values used to determine significance (padj, log2Fold change, pvalue, fold change, log10padj).

**Dataset S4 (separate file). GSEA Enriched KEGG Pathways (.xlsx workbook).** GSEA statistics associated with pathways enriched and depleted following three pairwise comparisons: A) life stage specific comparison, B) Sequential life stage comparison, and C) intermediate life stage comparisons. Each tab (excluding the first) represents a family of similar KEGG pathways. The first tab visually summarizes the change in enrichment across all pairwise comparisons for a subset of pathways of interest.

**Dataset S5 (separate file). Enzymes from GSEA Enriched KEGG Pathways (.xlsx workbook).** Each row represents an enzyme within each KEGG pathway and for each lifestage comparison if the pathway is enriched or depleted. Columns represent LOC numbers (Probe), GSEA metrics (Rank in Gene List, Rank Metric Score, Running ES), and if the enzyme is enriched or not (Core Enrichment). Each Tab represents an individual KEGG pathway.

**Dataset S6 (separate file). Expression and Methylation Profiles of Symbiotic and Developmental Genes of Interest (.xlsx workbook).** Genes identified previously to be important for symbiotic metabolism (sheet 1; Kim et al. 2018) or developmental processes (sheet 2; Shigenobu et al. 2010) are compared to expression and methylation data from this study. Each row represents a different gene of interest (represented by LOC#, gene name, and if applicable EC number). The next 5 columns contain the normalized mRNA expression level (average of 3 biological replicates) during each of the five lifestages. These cells have been colored to represent changes in expression level (dark purple = global min. expression value, white = global median expression value, dark green = max. global expression value). The next nine columns contain the log2FoldChange value if that gene is significantly differentially expressed in that specific lifestage comparison (empty cell = N.S.). These cells have also been colored to represent changes in expression level (red = downregulated in the later of the two stages, white = no change, blue = upregulated in the later of the two stages). The next nine columns contain the change in percent methylation value if that gene is significantly differentially methylated in that specific lifestage comparison (empty cell = N.S.). These cells have also been colored to represent changes in methylation level (red = hypomethylated in the later of the two stages, white = no change, blue = hypermethylated in the later of the two stages). The last three columns (Symbiotic GOI only) contain previously observed results from Kim et al. (2018). These include if the gene was significantly differentially expressed (log2FC, colored in similar manner to previous log2FC data), differentially spliced (X = significantly, blank = N.S./no), and/or differentially methylated (X = significantly, blank = N.S./no) in bacteriocyte cells versus body tissue of 4th instar aphid nymphs.

**Dataset S7 (separate file). Differentially Methylated Sites (.xlsx workbook).** Genomic sites found to be differentially methylated (padj: ≤ 0.05 & change in meth. ≥ 25%) between two sequential lifestages, or between an individual lifestage and all other lifestages, with the methylKit program. Each row represents a different genomic site (identified by chr: chromosome (Col. B), DMS: bp of methylated CpG on chromosome (Col. C), and strand: + or – DNA strand (Col. D)) that is significantly differentially methylated between the two lifestages being compared. LOC # or gene names have also been included in Col. A after using a custom python script to annotate genomic locations (Col. B-D). Col. E – Col. G represent statistics used to test for significance (p-value, q-value, meth.diff (% change in methylation)).

**Dataset S8 (separate file). Differentially Methylated and Differentially Expressed Genes and Isoforms (.xlsx workbook).** Genes/isoforms that are both significantly differentially methylated and expressed are listed in each row. Each Lifestage comparison is then represented by five columns. These columns include the LOC#, the Genomic Location, and the gene name for each gene/isoform, as well as its differential expression (log2FC) and differential methylation (% change in methylation). Both of these values are calculated by subtracting the latter of the two stages from the former of the two stages, and have been color coded to represent changes (red = downregulated gene expression, blue = upregulated gene expression, orange = hypomethylation, green = hypermethylation, describing the state of the later of the two stages being compared).

**Dataset S9 (separate file). RNAseq Code (.docx).** Notes on the programs, databases, and code/scripts used in this data analysis.

**Dataset S10 (separate file). WGBSseq Code (.docx).** Notes on the programs, databases, and code/scripts used in this data analysis.

**SUPPLEMENTAL REFERENCES**

Bookout A. L., Cummins C. L., Mangelsdorf D. J., Pesola J. M., Kramer M. F., 2006. High-throughput real-time quantitative reverse transcription PCR. Current protocols in molecular biology / edited by Frederick M. Ausubel ... [et al.], Chapter 15, Unit 15.8.

Kim D., Minhas B.F., Li-Byarlay H., Hansen A.K., 2018. Key transport and ammonia recycling genes involved in aphid symbiosis respond to host-plant specialization. *G3* 8(7): 2433-2443.

Ramakers C., Ruijter J.M., Lekanne Deprez R.H., Moorman A.F.M., 2003. Assumption-free analysis of quantitative real-time polymerase chain reaction (PCR) data. *Neurosci Lett.* 339(1): 62-66.

Ruijter J.M., Ramakers C., Hoogaars W.M.H., Karlen Y., Bakker O., van den Hoff M.J.B., Moorman A.F.M., 2009. Amplification efficiency: linking baseline and bias in the analysis of quantitative PCR data. *Nucleic Acids Res.* 37(6): e45.

Shigenobu S., Bickel R.D., Brisson J.A., Butts T., Chnag C-C., Christiaens O., ... Stern D.L., 2010. Comprehensive survey of developmental genes in the pea aphid, *Acyrthosiphon* *pisum*: frequent lineage‐specific duplications and losses of developmental genes. *Insect Molecular Biology* 19(s2): 47– 62.
